# Supplementary material for: ‘Am I really hungry?’ A qualitative exploration of patients’ experience, adherence and behaviour change during hunger training: a pilot study
Source: PubMed Central journal article supplement — BMJ Open. 2019 Dec 31;9(12):e032248. doi: 10.1136/bmjopen-2019-032248 (PMC6955552; doi:10.1136/bmjopen-2019-032248), 2019-12-31
Supplement: bmjopen-2019-032248.draft_revisions.pdf [file bmjopen-2019-032248.draft_revisions.pdf]

# BMJ Open

BMJ Open is committed to open peer review. As part of this commitment we make the peer review history of every article we publish publicly available.

When an article is published we post the peer reviewers' comments and the authors' responses online. We also post the versions of the paper that were used during peer review. These are the versions that the peer review comments apply to.

The versions of the paper that follow are the versions that were submitted during the peer review process. They are not the versions of record or the final published versions. They should not be cited or distributed as the published version of this manuscript.

BMJ Open is an open access journal and the full, final, typeset and author-corrected version of record of the manuscript is available on our site with no access controls, subscription charges or pay-per-view fees (<http://bmjopen.bmj.com>).

If you have any questions on BMJ Open's open peer review process please email [info.bmjopen@bmj.com](mailto:info.bmjopen@bmj.com)

# BMJ Open

## **“Am I really hungry?” A qualitative exploration of patients’ experience, adherence, and behaviour change during a Hunger Training intervention**

|                               |                                                                                                                                                                                                       |
|-------------------------------|-------------------------------------------------------------------------------------------------------------------------------------------------------------------------------------------------------|
| Journal:                      | <i>BMJ Open</i>                                                                                                                                                                                       |
| Manuscript ID                 | bmjopen-2019-032248                                                                                                                                                                                   |
| Article Type:                 | Original research                                                                                                                                                                                     |
| Date Submitted by the Author: | 11-Jun-2019                                                                                                                                                                                           |
| Complete List of Authors:     | de Bruin, Willeminj ; University of Otago, Medicine<br>Ward, Aimee; University of Otago, Medicine<br>Taylor, Rachael; University of Otago, Medicine<br>Jospe, Michelle; University of Otago, Medicine |
| Keywords:                     | NUTRITION & DIETETICS, PUBLIC HEALTH, QUALITATIVE RESEARCH, OBESITY, TRANSLATIONAL RESEARCH, ADHERENCE                                                                                                |
|                               |                                                                                                                                                                                                       |

SCHOLARONE™  
Manuscripts

1  
2  
3 **“Am I really hungry?” A qualitative exploration of patients’ experience,**  
4 **adherence, and behaviour change during a Hunger Training intervention**  
5  
6  
7

8  
9 **Authors:**

10 Willemijn E. de Bruin<sup>a</sup>, Aimee L. Ward<sup>a</sup>, Rachael W. Taylor<sup>a</sup> and Michelle R. Jospe<sup>a</sup>  
11  
12

13 **Author affiliation:**

14 <sup>a</sup>Dept of Medicine, University of Otago, PO Box 56, Dunedin, New Zealand, 9054  
15  
16

17 w.debruin@otago.ac.nz

18 aimee.ward@otago.ac.nz

19 rachael.taylor@otago.ac.nz

20 michelle.jospe@otago.ac.nz  
21  
22  
23

24 **Corresponding author:**

25 Dr Michelle R Jospe

26 Dept of Medicine, University of Otago, PO Box 56, Dunedin, New Zealand, 9054  
27  
28

29 Michelle.jospe@otago.ac.nz, +64 21 037 5002  
30  
31

32 3334 words  
33  
34  
35  
36  
37  
38  
39  
40  
41  
42  
43  
44  
45  
46  
47  
48  
49  
50  
51  
52  
53  
54  
55  
56  
57  
58  
59  
60

## ABSTRACT

**Objectives** Hunger training is an intervention designed to teach people to eat according to their hunger by connecting physical symptoms of appetite with glucose levels. Hunger training is most effective for weight loss, and improving eating behaviours when adherence is high. However, adherence is a challenge that should be prior to wider dissemination. The aim of this study was to explore participants' experience, adherence, and behaviour change related to hunger training.

**Design** A qualitative study, nested within a randomised controlled pilot study of two different methods of monitoring glucose during hunger training. Semi-structured interviews were audio-recorded, transcribed verbatim, and analysed thematically using an inductive approach.

**Setting** Single centre study with participants recruited from the local area.

**Participants** 40 participants began the pilot study and 38 participants (52.6% female) remained at 1 month and completed interviews.

**Results** Most participants felt they were able to match their hunger to their glucose levels by the end of the intervention. The main adherence barriers were the social pressure to eat, lack of time, and lack of flexibility in participants' meal schedules. Common adherence enablers were having a set routine, social support, and accountability. Participants described increased awareness of hungry versus non-hungry eating and better cognition of feelings of hunger and satiety as a result of the intervention, which in turn led to changes of food choice, portion size, and adjusted meal timing and frequency.

**Conclusions** Findings show that hunger training is acceptable from a patient perspective, and results can be used to inform the translation of hunger training programs to health care settings.

**Trial registration** ACTRN12618001257257

### Strengths and limitations of study

- In-depth interviews allowed for detailed insight into participants' experiences of hunger training, including adherence barriers and enablers as well as behaviour change.
- Rigorous analysis provided confidence in our findings, which are applicable to other lifestyle interventions.
- While our sample was diverse in terms of sex, age, education, and income, the New Zealand setting, as well as the predominantly European ethnicity of participants may limit extrapolation to other countries and cultures.
- As with all interviews, there was potential for response biases, however we tried to limit this by introducing an independent researcher for the interviews.

## INTRODUCTION

Weight management is crucial to prevent chronic diseases, however most weight loss diets prove unsustainable in the long-term.<sup>1,2</sup> A more viable approach may be to teach people to eat according to their appetite signals, which has been shown to benefit weight maintenance. However, they have been inconsistently effectively for weight loss.<sup>3-7</sup> This may be because overweight and obesity is linked with difficulty sensing and responding to physiological hunger and satiety cues, decreasing awareness of appetite.<sup>8-10</sup>

To overcome this barrier, an intervention known as hunger training (HT) uses glucose monitoring as an indicator of hunger to help people gain greater awareness of their appetite signals, and eat accordingly.<sup>11,12</sup> Hunger training produces clinically important weight loss, and reduced emotional and external eating.<sup>13-15</sup>

The combination of the minimal human resources required for the delivery of HT, and the potential of sustainable weight management makes it a promising intervention for primary health care. However, as with most health interventions, adherence is a challenge that must be investigated prior to wider dissemination.<sup>16,17</sup> Previous work has shown that benefits of HT are greater for participants with higher adherence, and that only about one-third of participants sufficiently adhere to experience a clinically beneficial effect.<sup>15</sup> Before HT can be implemented widely, the underlying mechanisms that contribute to the effectiveness of HT and the barriers and enablers to adherence must be determined. We aimed to qualitatively explore study participants' experience, adherence, and behaviour change after experiencing HT to inform translation of HT from research to practice.

## METHODS

### Study design and participants

This study was approved by the New Zealand Southern Health and Disability Ethics Committee (18/STH/105) and was registered with the Australian New Zealand Clinical Trials Registry (ACTRN12618001257257). All participants provided written informed consent.

Forty adults were recruited from Aug–Oct 2018 from the local community through social media channels and local advertisement, and were included if they were 18 years of age or older, had a body mass index (BMI) of 30 kg/m<sup>2</sup> or higher, and were willing to measure their glucose by fingerprick blood sample and wear a continuous glucose monitor. Exclusion criteria were use of medication that affects weight; pregnancy or breastfeeding; allergy to surgical adhesive; skin changes or disease on the upper arm; or imaging appointments scheduled during the study.

### Patient and public involvement

No patient or public were involved in the development of the research question, interpretation of the results, or writing of this document. The results will be disseminated to participants via email.

## Randomisation and procedures

Participants were randomized to one of two groups using computerized block randomisation with random length blocks after stratification for sex. The “fingerpricking” group measured their capillary glucose from a fingerprick sample by portable glucometer (Abbott Freestyle Optium Glucose Meter, Australia, Figure 1a). The “scanning” group used the Freestyle Libre Flash Glucose Monitoring system (Abbott Diabetes Care, Australia, Figure 1b), which continuously measures interstitial glucose every 15 minutes. A thin water-resistant sensor was inserted just under the skin on the back of the arm, and remained there for 14 days, then replaced. When the participant wanted to test their glucose, they passed a reader over their arm to display current glucose levels. Both HT groups received the same guidance and support.

## Hunger training intervention

Participants were instructed to only eat or drink a caloric beverage if their glucose concentration was below their individualised cut-off, which was based on the average of fasting glucose from their first two mornings. If participants’ glucose was above their cut-off value, they were instructed to wait at least 20 minutes before retesting.

Alongside the glucose monitoring, participants were asked to rate their hunger level (Figure 2), and to note their glucose level and whether they ate, every time they wanted to consume food or caloric drink. Participants attended three HT appointments. At baseline, participants were introduced to HT and taught how to measure their glucose, based on their randomisation. At the day 14 visit, participants could ask questions and discuss challenges and successes, and were provided with a reading on intuitive eating using glucose monitoring.<sup>18</sup> On the last visit, participants returned their equipment and participated in a semi-structured interview.

## Data collection

Researchers conducted in-depth interviews with each participant at the last visit. A semi-structured interview guide (see supplementary file) was developed to explore 1) participants’ experiences of HT; 2) perceived behaviour change due to HT; 3) adherence to the intervention; 4) future expectations; and 5) intervention feedback. All interviews were digitally recorded, and professionally transcribed verbatim. Transcripts were processed anonymously. After reviewing the transcribed interviews, it was clear that saturation had been reached and it was deemed unlikely that new topics would arise.<sup>19 20</sup>

## Data analysis

The transcribed interviews were systematically scrutinized to guide coding development, key to employing grounded theory in qualitative work.<sup>21 22</sup> Codes were first piloted and refined using a subset of interviews; each interview was coded for themes by two researchers using NVivo.<sup>23</sup> The thematic analyses took an inductive approach and included familiarisation with the interviews and transcripts, development of codes,

collating codes into themes, and the researchers convened to reconsolidate any disagreements.<sup>22-24</sup> Researchers conducting analyses were blind to any participant classifications.

The results section includes the use of qualifiers that have been adapted from previous studies.<sup>25-27</sup> When an issue was discussed by 1 to 9 participants, we referred to a 'few'; for between 10 and 20 participants, we referred to 'some'; for between 21 and 30 participants we referred to 'most'; for between 31 and 37 we referred to 'almost all'; and for 38 we referred to 'all'.

## RESULTS

The research team conducted a total of 38 semi-structured interviews with HT participants; 2 participants dropped out of the study before their interview. Participants ranged in age from 20 to 78 years, had an HbA1c between 28 and 100 mmol/mol, and an individualised glucose cut-off between 4.0 and 14.0 mmol/L (Table 1). Overall themes can be found in Figure 3.

**Table 1.** Baseline characteristics of participants

| Variable                                     | All (n=38)   |
|----------------------------------------------|--------------|
| Randomised to scanning, n (%)                | 19 (50.0)    |
| Female, n (%)                                | 20 (52.6)    |
| Age (years)                                  | 45.0 (13.0)  |
| HbA1C (mmol/mol) (median, IQR)               | 37.0 (34-42) |
| Glucose cut-off (mmol/L)                     | 6.1 (1.9)    |
| Diabetes status, n (%)                       |              |
| Non-diabetic                                 | 27 (71.1)    |
| Pre-diabetic                                 | 8 (21.1)     |
| Type 2 diabetes                              | 3 (7.9)      |
| Body mass index (kg/m <sup>2</sup> )         | 38.3 (7.4)   |
| Education, n (%)                             |              |
| School only                                  | 12 (31.6)    |
| Post-secondary                               | 4 (10.5)     |
| University                                   | 22 (57.9)    |
| Ethnicity, n (%) <sup>a</sup>                |              |
| New Zealand European                         | 36 (94.7)    |
| Māori                                        | 4 (10.5)     |
| Samoan                                       | 2 (5.3)      |
| Other                                        | 3 (7.9)      |
| Partnered, n (%)                             | 25 (65.8)    |
| Household income (New Zealand Dollar), n (%) |              |
| <50k                                         | 14 (36.8)    |
| 50-100k                                      | 11 (28.9)    |
| 100-150k                                     | 12 (31.6)    |
| >150k                                        | 1 (2.6)      |
| Depression Anxiety Stress Scale (DASS-21)    |              |
| Stress                                       | 12.2 (8.7)   |
| Depression                                   | 9.1 (9.3)    |
| Anxiety                                      | 7.7 (5.7)    |

Values are mean (standard deviation) unless otherwise indicated. <sup>a</sup>Multiple options are possible therefore responses surpass 100%.

### Participants' experiences with hunger training

#### *Glucose measuring experience and adherence*

1  
2  
3 Participants explained that it was useful to have an objective measure of their hunger; *"It*  
4 *was helpful to see an actual concrete measurement of 'Was I actually hungry? Or was I just*  
5 *imagining that kind of thing?' [...] it was actually something quite tangible."* - #25, scanner. A  
6 few participants commented that HT increased their self-efficacy; *"I was unprepared to feel*  
7 *empowered by taking that modicum of control. So that was really cool.* - #63, scanner.  
8  
9

10 Almost all participants described situations where they were unable to adhere to the HT  
11 protocol, and ate without measuring their glucose levels or ate when their glucose was  
12 above their cut-off. Some reasons for not measuring were because they forgot equipment  
13 or forgot to measure; were too busy; or were in social situations that made measuring  
14 difficult. Reasons for eating above cut-off included social pressure to eat, feeling extremely  
15 hungry, a lack of flexibility to eat at different times, illness and eating out of habit.  
16  
17

18 Most participants discussed the social pressure to eat; *"In a dinner situation where you've got*  
19 *to eat when everyone else is eating. You can't not eat, can't just say 'sorry, I'm checking my*  
20 *glucose'."* - #72, scanner. Participants also described the cultural importance of food in their  
21 families or social groups as reasons for not adhering.  
22  
23

24 There was a clear distinction in experiences and adherence barriers between participants  
25 randomized to fingerpricking compared to those who were randomized to scanning. Most  
26 of those who were ambivalent, and all three participants who were outspokenly negative  
27 about their glucose measuring experience, were randomised to fingerpricking. Almost all  
28 fingerprickers addressed the pain and inconvenience of testing, such as spilling blood,  
29 difficulty in obtaining sufficient blood, having to wash hands before pricking and  
30 disposing the lancets safely. A few explained that they were initially hindered by the pain  
31 but that they got used to it over time, whereas others thought that pain got worse. A few  
32 also explained the pain and inconvenience helped them be mindful; *"That pain and*  
33 *inconvenience did I help me, it set the routine because it's like ok to eat I have to do this very*  
34 *inconvenient thing and cause myself a little bit of pain, do I really want to go ahead with that, is*  
35 *that chocolate biscuit really worth that and often the answer was no."* - #9, fingerpricker. Those in  
36 the fingerpricking group were more likely to describe social situations in which they did  
37 not adhere since measuring their glucose made them feel self-conscious and a few  
38 expressed worries about being stigmatized.  
39  
40  
41  
42  
43  
44  
45  
46  
47

48 Those who used the scanner were generally more positive about their glucose measuring  
49 experience. Almost all said scanning was quick, easy, discreet, and convenient, which  
50 allowed for frequent checking.  
51

52 Participants who were classified as pre-diabetic or diabetic did not report remarkably  
53 different experiences than those who were non-diabetic.  
54  
55

### 56 ***Booklet experience and adherence***

57  
58  
59  
60



1  
2  
3 A few participants explained the booklet helped them discover a pattern between their  
4 hunger and glucose and be more aware of food intake. A few explained how the hunger  
5 scale helped them understand hunger and fullness.  
6

7  
8 A few participants explained they occasionally forgot to complete the booklet, that it was  
9 impractical, and that it was “just another thing to carry around”. Hence, some participants  
10 explained that they only completed the booklet retrospectively. Several participants  
11 suggested developing a smartphone app to replace the booklet.  
12  
13

14 A few felt that the hunger scale should be personalized, or reflect feelings instead of  
15 numbers. Participants also talked about additional information that could be included in  
16 the booklet, including exercise and dietary recommendations, mindfulness and adherence  
17 techniques, and coping strategies for cravings.  
18  
19

### 20 *Adherence enablers*

21  
22 Some participants stated that daily structure and normal routine helped them comply.  
23 Social support and accountability was another adherence enabler for some participants,  
24 specifically that provided by family and friends who helped them stick to the routine of  
25 checking their glucose and eating appropriately. A few mentioned their doctors expressed  
26 interest in the study and were supportive, providing another level of accountability.  
27  
28

29  
30 Others indicated that adherence became easier; *“I think it got easier as time’s gone on because*  
31 *as I was more mindful about eating breakfast and I guess doing preparations for lunch, knowing*  
32 *what’s coming and how to fit it in with the [glucose] levels.” - #37, scanner.*  
33  
34

### 35 *Association between glucose and hunger*

36  
37 Most participants were able to determine a clear association between their glucose levels  
38 and hunger; *“I noticed that [...] when I was feeling really hungry, stomach growling, that my*  
39 *glucose was under four, which was like my threshold. I kind of almost got intuitive about it.” - #38,*  
40 *scanner.* Those who were able to detect an association described a learning curve, with the  
41 association became clearer over time.  
42  
43

44  
45 A few were unable to recognise an association and felt confused. This was more common  
46 among fingerprickers. Common reasons for confusion were when glucose levels were high  
47 before breakfast, after physical activity, and when they felt very hungry. Some recognised  
48 that glucose readings were elevated when they were busy, stressed, or unwell.  
49  
50

### 51 *Awareness of hunger*

52  
53 The majority of participants reported that they became better at recognising hunger. This  
54 made HT different from other weight management strategies they had previously  
55 attempted; *“I’ve tried listening to people, I’ve tried following routines, I’ve tried all that sort of*  
56 *thing and I occasionally lose [a few] kilos and then I go straight back to square one because I don’t*  
57 *know how to... read my body. I didn’t know what it felt like to be hungry. I didn’t know that the*  
58  
59  
60

1  
2  
3 way I felt was actually what it feels like to be full. So, I was keeping myself constantly full." - #42,  
4 scanner. The scale opened their eyes to the fact there was a continuum of hunger sensations

5  
6 Some struggled to identify with the provided descriptors of each of the hunger levels on  
7 the hunger scale. A few overcame this by personalising their scale and/or using half  
8 points. However, others referred to initially being unfamiliar with some cues but then  
9 experiencing them for the first time during the study; "I've been married 11 years and my wife  
10 heard my stomach rumble and she was like "I've never heard that before!" - #64, fingerpricker.  
11 Only a few participants felt that HT did not improve their ability to recognise real hunger.  
12  
13  
14  
15

### 16 *Awareness of non-hungry eating*

17 Almost all participants learned to tell the difference between hungry and non-hungry  
18 eating; "It was interesting to start to find out whether there was an actual need for food from the  
19 blood glucose reading versus whether it was a mind thing. I was actually quite quick to adjust to it  
20 and it gave a good chance to understand the feelings of hunger that you get, whether it might be  
21 physical or psychological, or just the environment you're in." - #37, scanner. Some were  
22 surprised to discover that they regularly ate when they were not hungry; "I didn't think  
23 that I would be susceptible, like at the start of the study they talked about eating when you're bored,  
24 or eating when you're emotional and I totally expected to be above all of that petty human [stuff]  
25 because I'm intelligent. It was really eye opening, especially in the first two weeks of the study, just  
26 how programmed or routine a lot of my eating is." - #63, scanner.  
27  
28  
29  
30  
31

32 Once aware of their non-hungry eating, participants generally avoided it; "If I have  
33 anything now, even if blood glucose is fine, that's going to affect my ability to have something, a  
34 meal later on when I'm really hungry and I then my blood glucose would be more than likely too  
35 high to allow me to eat when I wanted to later on" - #9, fingerpricker.  
36  
37

38 The most popular reason for non-hungry eating was boredom; "I'd say I was a bored eater.  
39 Like I'd be at home, what do I want to do? Uh, I don't really know, I'm just walking around the  
40 kitchen, just open up the pantry for no reason, and [...], I'm here, so I'll grab something." - #79,  
41 fingerpricker. A few turned to food when stressed or upset. Some believed that if they  
42 didn't eat regularly, their body would go into "starvation mode"; "Well, often people tell you  
43 if you ate too little that you will put your body into starvation mode and then it will hold onto the  
44 fat." - #42, scanner.  
45  
46  
47  
48

49 In terms of physical symptoms, some realised that they had confused hunger and thirst.  
50 Others realised they ate when tired, in order to give them energy. For a few, non-hungry  
51 cravings reduced once they stopped responding to them.  
52

53 A few mentioned they ate when they were not hungry because of their environment; "I  
54 walked down past the café this morning, I went, 'Ah, food'. It was really good to go to my brain,  
55 'No, you're not hungry, this is just your body pretending'." - #62, scanner. A lot mentioned they  
56 used to eat out of habit or routine, related to time of day; "Eat when I'm hungry, rather than  
57  
58  
59  
60

eat because it's 12 o'clock." - #22, fingerpricker, or activity; "Have chips and dip and watch the rugby" - #69, scanner.

Participants developed strategies when faced with triggers. The most common coping mechanism to avoid non-hungry eating was to drink water or another sugar-free beverage. Some diverted themselves with chores, a walk, or other activities. Participants dealt with social eating by planning ahead; "There's another gathering this Saturday, so if I'm going to go and don't feel like I'm really hungry to eat, I can take the food and do a takeaway and say, 'oh I'll take this and I'll have it later'." - #76, scanner. One participant used strategies she used when quitting smoking; "I'd implement the breathing like you would have [when] you were having a cigarette. I would talk to someone or talk to myself if no one was around, 'you know what this is you know that this is a craving, you just have to ride through it.'" - #42, scanner.

### Awareness of fullness

A couple of participants randomised to the scanner connected their physical sensations with their glucose; "I could scan myself within half an hour of a heavy meal and be able to go see 'you're full, look what that's done' and show myself that actually this is what your body needs versus what it wants." - #42, scanner. Participants also used the hunger scale to identify their satiety, however, they expressed they were less confident about recognising fullness.

Some participants became aware of feeling uncomfortable from overeating, especially after their evening meal. A couple of participants noticed their sleep improved after reducing overeating.

### Behaviour change

The main behaviour changes were changing their portions, food choices, and timing and frequency of meals (Table 2).

**Table 2.** Behaviour changes due to hunger training

| Theme description                                                                                                                                         | Representative quotes                                                                                                                                                                                                                                                                                                     |
|-----------------------------------------------------------------------------------------------------------------------------------------------------------|---------------------------------------------------------------------------------------------------------------------------------------------------------------------------------------------------------------------------------------------------------------------------------------------------------------------------|
| <b>Portion size reduction</b>                                                                                                                             |                                                                                                                                                                                                                                                                                                                           |
| Most participants reduced the amount of food they ate at a given meal                                                                                     | "This could show me in a physical way that you're not actually starving yourself eating this small amount. I learned really quickly that actually if I get a six-inch subway sandwich, I'm just as full and satisfied for just as long a time period as I am if I have [the amount] that I'd normally get." - #42 scanner |
| Some specifically reduced their portions of unhealthy foods, or foods that spiked their glucose                                                           | "Instead of buying a decent size cake of chocolate I bought the little bars and that was because I had in my mind the spike that would then come and associated the spike with what then is happening in your body." - #25, scanner                                                                                       |
| Others reduced their intake in order to be able to eat when desired                                                                                       | "I've noticed that if I'm having less at lunch [...] then I'm able to eat my dinner at dinner time versus having a huge lunch and then my blood sugar is still so high that I couldn't have dinner." - #38, scanner.                                                                                                      |
| A few participants noticed their evening meal influenced morning glucose levels, often modifying their evening meal to eat breakfast at a convenient time | "We had a friend round and I had a dessert. I had to wait 20 minutes or longer in the morning. But I don't have 20 minutes in the morning. So, I was like, 'okay, let's not do that'." - #79, fingerpricker.                                                                                                              |
| <b>Food choice</b>                                                                                                                                        |                                                                                                                                                                                                                                                                                                                           |

|                                                                                                                                                                                                                                                                                                                                                                                                                                                                    |                                                                                                                                                                                                                                                                                                                                                                                                                 |
|--------------------------------------------------------------------------------------------------------------------------------------------------------------------------------------------------------------------------------------------------------------------------------------------------------------------------------------------------------------------------------------------------------------------------------------------------------------------|-----------------------------------------------------------------------------------------------------------------------------------------------------------------------------------------------------------------------------------------------------------------------------------------------------------------------------------------------------------------------------------------------------------------|
| Participants from both groups found particular foods delayed their next subsequent meals due to being over their glucose cut-offs, and those wearing the scanner reported seeing a spike in glucose levels after consuming certain foods (or “spikey” foods). People also noticed which foods kept them satisfied for longer, which they viewed as positive.                                                                                                       | <i>“It made me acutely aware of what foods lasted me longer before the start growl [stomach growl] level was achieved.” - #50, scanner.</i>                                                                                                                                                                                                                                                                     |
| Reduced intake of “sugary foods” and “sweet stuff”, bread, chips, biscuits, chocolate, cakes, takeaways and fast food, sugar-sweetened beverages (SSBs), and alcohol.                                                                                                                                                                                                                                                                                              | <i>“It was more around the drinking because I take a lot of convincing that things [are] right loaded with sugar and if I can't see it, I'm probably not going to believe a word you say. So, it was good to see it [...] After [I drank] I pricked my finger and saw it did shoot up, I would think a bit and have a look at what I was drinking and what was in it.” - #40, fingerpricker.</i>                |
| Increased intake of vegetables, salads, homemade meals, nuts, eggs, water, and coffee.                                                                                                                                                                                                                                                                                                                                                                             |                                                                                                                                                                                                                                                                                                                                                                                                                 |
| Increased planning of meals                                                                                                                                                                                                                                                                                                                                                                                                                                        |                                                                                                                                                                                                                                                                                                                                                                                                                 |
| <b>Timing and frequency of meals</b>                                                                                                                                                                                                                                                                                                                                                                                                                               |                                                                                                                                                                                                                                                                                                                                                                                                                 |
| Most reduced their number of eating occasions by eliminating snacking. The majority of this group changed their habit of grazing to eating a fixed number of meals a day, because they realised that they were not hungry, did not want to delay their next meal, and/or to avoid fingerpricking. Most chose to have a sugar-free beverage instead of food; a few combined their snack food with their main meal.                                                  | <i>I would amalgamate [a snack] into a meal. So, this last weekend we were away so you know, we'd have a handful of chips, one or two crackers, some bits and pieces [...], and then you go, okay well I've had it. Now the old me, prior to this [study], would be having it a bit later on when the blood sugar would still be high and two, I'd probably be having the entire pack - #64, fingerpricker.</i> |
| For most, monitoring their glucose confirming their normal morning food pattern. However, some had glucose levels that were too high to eat breakfast at their usual time. For these participants, elevated morning glucose was frustrating. Some ate later, and others ignored their glucose and ate anyway. A few were glad their glucose levels confirmed they did not need to eat breakfast, as they never enjoyed breakfast and felt guilty about skipping it | <i>“Because based on my monitoring, I'm pretty good, and I don't need to have breakfast, which was a relief, because I'm not a fan of breakfast to begin with.” - #62, scanner</i>                                                                                                                                                                                                                              |

*Note: Themes listed in order of frequency*

### Future expectations

Almost all participants expressed they were motivated and hopeful about continuing with their recent behaviour changes. A few explained they would have liked to measure their glucose for longer to gain confidence about their hunger levels and some (mostly those who scanned) expressed concern about being without their equipment. This feeling of concern generally revolved around the fact that they would be without immediate feedback. On the contrary, other participants were happy and confident to leave their equipment behind. A few participants reflected that following HT without equipment would be the next step.

### DISCUSSION

Most participants had a positive experience of HT, and were able to match their hunger to their glucose levels by the end of the study, which is consistent with other findings<sup>28</sup> and our previous results.<sup>14</sup> While the majority found an association between hunger and glucose, some experienced confusion, which is likely related to the homeostatic control of glucose.<sup>12</sup>

1  
2  
3 The main adherence barriers of social pressure to eat, lack of time, and lack of flexibility in  
4 meal schedule, and the main enablers of routine, social support, and accountability, are  
5 consistent with those of a systematic review of determinants of adherence to lifestyle  
6 interventions in adults with obesity.<sup>16</sup> Participants realised that they were previously  
7 unaware of feelings of appetite, supporting the theory that some with overweight/obesity  
8 have blunted sensations of hunger and satiety.<sup>8-10</sup> Participants primarily changed their  
9 behaviour by becoming aware of hungry versus non-hungry eating, recognising feelings  
10 of hunger and satiety, reducing their number of meals, and exploring the effect of different  
11 types of foods on their glucose. This is in line with a review of mindful and intuitive eating  
12 interventions wherein participants became more aware of and reduced non-hungry  
13 eating.<sup>29</sup> Although historically HT enhances recognition of hunger rather than satiety,<sup>28</sup>  
14 our results indicate our participants learned to recognize feelings of fullness.

15  
16 Participants randomised to use the scanners generally described fewer negative  
17 experiences and less adherence barriers, and were more inclined to try different foods to  
18 see the effects on their glucose, due to the ease of scanning. However, those randomised to  
19 fingerpricking may have become more mindful of their hunger, since they carefully  
20 considered their hunger before submitting to the effort and discomfort of fingerpricking.  
21 Fingerprickers were more confident returning their glucose measuring equipment,  
22 perhaps due to their established awareness of hunger.

23  
24 As suggested by our participants, a mobile app instead of a paper booklet, and including  
25 nutrition and exercise recommendations, and strategies to cope with emotional and social  
26 eating may increase adherence, and this agrees with current recommendations.<sup>30</sup> Social  
27 support, and involving family and friends may improve adherence and benefits, as  
28 demonstrated elsewhere.<sup>31-33</sup>

29  
30 Our analysis was robust; the researchers were blinded for participant characteristics, all  
31 transcripts were double-coded, and the results were analysed and interpreted by three  
32 researchers. As with all interviews there is potential for response bias, with a chance of  
33 study participants providing socially desirable answers to appease researchers.<sup>34</sup> We tried  
34 to limit this by introducing an independent researcher for the interviews.

35  
36 Our interviews allowed understanding of implemented behaviour changes and provided  
37 suggestions of how to better support participants in establishing healthy eating routines.  
38 Results of this study can be used to inform future HT programs and other healthy eating  
39 interventions in both primary care and public health settings.

## 40 41 42 43 44 45 46 47 48 49 50 51 52 53 54 55 56 57 58 59 60

### DECLARATIONS

**Author Contributions:** Conceptualization, W.E.dB., A.L.W., R.W.T. and M.R.J;  
Methodology, W.E.dB., A.L.W. and M.R.J; Formal Analysis, W.E.dB., A.L.W. and M.R.J;  
Resources, M.R.J; Data Curation, W.E.dB., A.L.W. and M.R.J; Writing-Original Draft  
Preparation, W.E.dB and M.R.J; Writing-Review & Editing, W.E.dB., A.L.W., R.W.T. and

M.R.J; Visualization, M.R.J; Project Administration, W.E.dB. and M.R.J; Funding Acquisition, R.W.T. and M.R.J.

**Funding:** This research was supported by a University of Otago Research Grant.

**Acknowledgments:** We would like to thank all participants involved in the hunger training pilot study (ACTRN12618001257257). Thank you to Associate Professor Ben Wheeler and Dr Sara Boucher for sharing their expertise with the Freestyle Libre Flash Glucose Monitoring system.

**Conflicts of Interest:** The authors declare no conflict of interest.

**List of Abbreviations:** BMI: Body Mass Index, DASS-21: Depression Anxiety Stress Scale, HbA1c: Hemoglobine A1c, HT: Hunger Training, IQR: Inter-Quartile Range, SSBs: Sugar-Sweetened Beverages.

## REFERENCES

1. Franz MJ, VanWormer JJ, Crain AL, et al. Weight-Loss Outcomes: A Systematic Review and Meta-Analysis of Weight-Loss Clinical Trials with a Minimum 1-Year Follow-Up. *J Am Diet Assoc* 2007;107(10):1755-67. doi: 10.1016/j.jada.2007.07.017
2. Johnston BC, Kanters S, Bandayrel K, et al. Comparison of Weight Loss Among Named Diet Programs in Overweight and Obese Adults: A Meta-analysis. *JAMA* 2014;312(9):923-33. doi: 10.1001/jama.2014.10397
3. Borkoles E, Carroll S, Clough P, et al. Effect of a non-dieting lifestyle randomised control trial on psychological well-being and weight management in morbidly obese premenopausal women. *Maturitas* 2016;83:51-58. doi: 10.1016/j.maturitas.2015.09.010
4. Leblanc V, Provencher V, Bégin C, et al. Impact of a Health-At-Every-Size intervention on changes in dietary intakes and eating patterns in premenopausal overweight women: Results of a randomized trial. *Clin Nutr* 2012;31(4):481-88. doi: 10.1016/j.clnu.2011.12.013
5. Provencher V, Bégin C, Tremblay A, et al. Health-At-Every-Size and Eating Behaviors: 1-Year Follow-Up Results of a Size Acceptance Intervention. *J Am Diet Assoc* 2009;109(11):1854-61. doi: 10.1016/j.jada.2009.08.017
6. Van Dyke N, Drinkwater EJ. Review Article Relationships between intuitive eating and health indicators: literature review. *Public Health Nutr* 2014;17(08):1757-66. doi: 10.1017/S1368980013002139
7. Bacon L, Keim NL, Van Loan MD, et al. Evaluating a 'non-diet' wellness intervention for improvement of metabolic fitness, psychological well-being and eating and activity behaviors. *Int J Obes* 2002;26:854. doi: 10.1038/sj.ijo.0802012
8. Barkeling B, King NA, Naslund E, et al. Characterization of obese individuals who claim to detect no relationship between their eating pattern and sensations of hunger or fullness. *Int J Obes* 2007;31(3):435-39. doi: 10.1038/sj.ijo.0803449
9. Blundell JE, Stubbs RJ, Golding C, et al. Resistance and susceptibility to weight gain: individual variability in response to a high-fat diet. *Physiol Behav* 2005;86(5):614-22. doi: 10.1016/j.physbeh.2005.08.052
10. Drapeau V, Blundell J, Gallant AR, et al. Behavioural and metabolic characterisation of the low satiety phenotype. *Appetite* 2013;70:67-72. doi: 10.1016/j.appet.2013.05.022

11. Flint A, Gregersen NT, Gluud LL, et al. Associations between postprandial insulin and blood glucose responses, appetite sensations and energy intake in normal weight and overweight individuals: a meta-analysis of test meal studies. *Br J Nutr* 2007;98(01):17-25. doi: 10.1017/S000711450768297X
12. Lemmens SG, Martens EA, Kester AD, et al. Changes in gut hormone and glucose concentrations in relation to hunger and fullness. *Am J Clin Nutr* 2011;94(3):717-25. doi: 10.3945/ajcn.110.008631
13. Ciampolini M, Lovell-Smith D, Sifone M. Sustained self-regulation of energy intake. Loss of weight in overweight subjects. Maintenance of weight in normal-weight subjects. *Nutr Metab* 2010;7:4. doi: 10.1186/1743-7075-7-4
14. Jospe MR, Brown RC, Roy M, et al. Adherence to hunger training using blood glucose monitoring: a feasibility study. *Nutr Metab* 2015;12:22. doi: 10.1186/s12986-015-0017-2
15. Jospe MR, Taylor RW, Athens J, et al. Adherence to Hunger Training over 6 Months and the Effect on Weight and Eating Behaviour: Secondary Analysis of a Randomised Controlled Trial. *Nutrients* 2017;9(11):1260.
16. Burgess E, Hassmén P, Pumpa KL. Determinants of adherence to lifestyle intervention in adults with obesity: a systematic review. *Clin Obes* 2017;7(3):123-35. doi: 10.1111/cob.12183
17. Leung AWY, Chan RSM, Sea MMM, et al. An Overview of Factors Associated with Adherence to Lifestyle Modification Programs for Weight Management in Adults. *Int J Environ Res Public Health* 2017;14(8):922.
18. Bacon L, Matz J. Intuitive Eating: Enjoy Your Food, Respect Your Body. *Diabetes Self-Management*, 2010:44-51.
19. Mason M. Sample Size and Saturation in PhD Studies Using Qualitative Interviews. *Forum Qual Soc Res* 2010;11(3) doi: 10.17169/fqs-11.3.1428 [published Online First: 2010-08-24]
20. Saunders B, Sim J, Kingstone T, et al. Saturation in qualitative research: exploring its conceptualization and operationalization. *Qual Quant* 2018;52(4):1893-907. doi: 10.1007/s11135-017-0574-8 [published Online First: 2017/09/14]
21. Sandelowski M. Whatever happened to qualitative description? *Res Nurs Health* 2000;23(4):334-40. doi: 10.1002/1098-240X(200008)23:4<334::AID-NUR9>3.0.CO;2-G
22. Strauss A, Corbin J. Basics of qualitative research: Techniques and procedures for developing grounded theory, 2nd ed. Thousand Oaks, CA, US: Sage Publications, Inc 1998.
23. NVivo qualitative data analysis software [program]. 12 version, 2018.
24. Thomas DR. A General Inductive Approach for Analyzing Qualitative Evaluation Data. *Am J Eval* 2006;27(2):237-46. doi: 10.1177/1098214005283748
25. Sandelowski M. Real qualitative researchers do not count: The use of numbers in qualitative research. *Res Nurs Health* 2001;24(3):230-40. doi: 10.1002/nur.1025
26. Van Cauwenberg J, Van Holle V, Simons D, et al. Environmental factors influencing older adults' walking for transportation: a study using walk-along interviews. *Int J Behav Nutr Phys Act* 2012;9(1):85. doi: 10.1186/1479-5868-9-85
27. Ward AL, Freeman C, McGee R. The influence of transport on well-being among teenagers: A photovoice project in New Zealand. *JTH* 2015;2(3):414-22. doi: 10.1016/j.jth.2015.06.004

- 1  
2  
3 28. Ciampolini M, Bianchi R. Training to estimate blood glucose and to form associations  
4 with initial hunger. *Nutr Metab* 2006;3:42. doi: 10.1186/1743-7075-3-42
- 5  
6 29. Warren JM, Smith N, Ashwell M. A structured literature review on the role of  
7 mindfulness, mindful eating and intuitive eating in changing eating behaviours:  
8 effectiveness and associated potential mechanisms. *Nutr Res Rev* 2017;30(2):272-83.  
9 doi: 10.1017/S0954422417000154 [published Online First: 2017/07/18]
- 10  
11 30. The Diabetes Prevention Program (DPP) Research Group. The Diabetes Prevention  
12 Program (DPP). *Diabetes Care* 2002;25(12):2165. doi: 10.2337/diacare.25.12.2165
- 13  
14 31. Lemstra M, Bird Y, Nwankwo C, et al. Weight loss intervention adherence and factors  
15 promoting adherence: a meta-analysis. *Patient Prefer Adherence* 2016;10:1547-59. doi:  
16 10.2147/PPA.S103649
- 17  
18 32. Verheijden MW, Bakx JC, van Weel C, et al. Role of social support in lifestyle-focused  
19 weight management interventions. *Eur J Clin Nutr* 2005;59:S179. doi:  
20 10.1038/sj.ejcn.1602194
- 21  
22 33. Elfhag K, Rössner S. Who succeeds in maintaining weight loss? A conceptual review of  
23 factors associated with weight loss maintenance and weight regain. *Obes Rev*  
24 2005;6(1):67-85. doi: 10.1111/j.1467-789X.2005.00170.x
- 25  
26 34. Stec JA. Bias. In: Lavrakas PJ, ed. *Encyclopedia of Survey Research Methods*. Thousand  
27 Oaks, California: Sage Publications, Inc. 2011:57-60.

## FIGURE CAPTIONS

28  
29  
30  
31 **Figure 1.** Glucose measuring equipment, (a) the Freestyle Optium Glucose Meter (Abbott  
32 Freestyle Optium Glucose Meter, Australia), test strip and lancet used by the  
33 “fingerpricking” group; (b) the Freestyle Libre Flash Glucose Monitoring system (Abbott  
34 Diabetes Care, Australia), worn by the “scanner” group.

35  
36  
37  
38  
39 **Figure 2.** A page spread from the hunger training booklet

40  
41  
42  
43 **Figure 3.** Themes emerging from hunger training pilot study

44  
45  
46  
47  
48  
49  
50  
51  
52  
53  
54  
55  
56  
57  
58  
59  
60



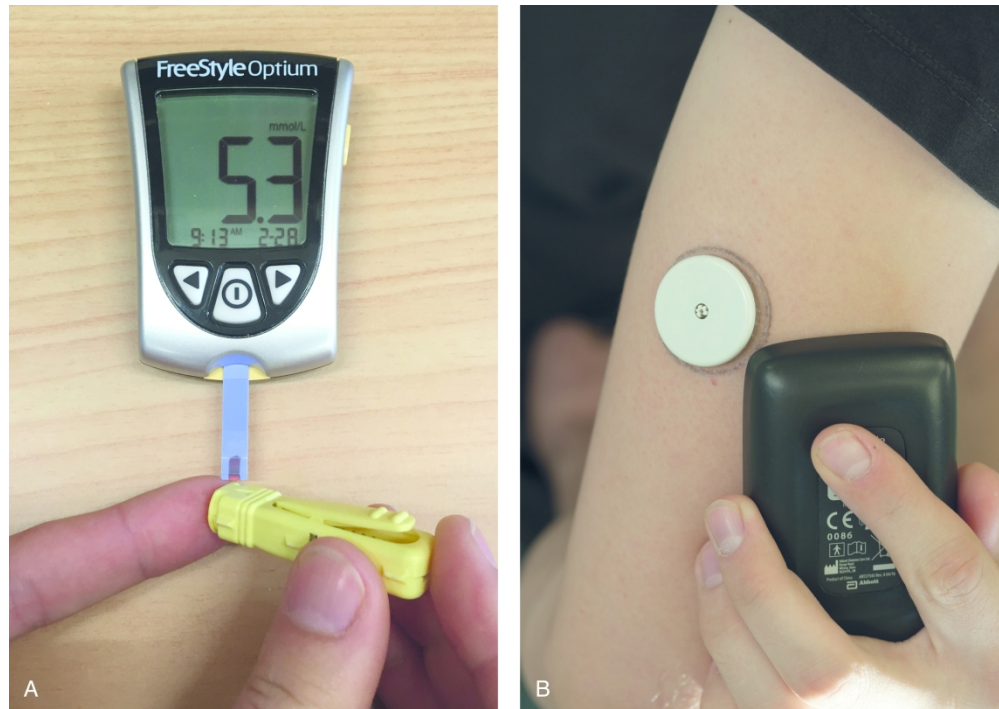

Figure 1. Glucose measuring equipment, (a) the Freestyle Optium Glucose Meter (Abbott Freestyle Optium Glucose Meter, Australia), test strip and lancet used by the "fingerpricking" group; (b) the Freestyle Libre Flash Glucose Monitoring system (Abbott Diabetes Care, Australia), worn by the "scanner" group. Photo by Thirunavukkarasye-Raveendran [CC BY 4.0 (<https://creativecommons.org/licenses/by/4.0>)]

189x133mm (300 x 300 DPI)

1  
2  
3  
4  
5  
6  
7  
8  
9  
10  
11  
12  
13  
14  
15  
16  
17  
18  
19  
20  
21  
22  
23  
24  
25  
26  
27  
28  
29  
30  
31  
32  
33  
34  
35  
36  
37  
38  
39  
40  
41  
42  
43  
44  
45  
46  
47  
48  
49  
50  
51  
52  
53  
54  
55  
56  
57  
58  
59  
60

### The Hunger Scale

|                                 |                                                      |                                           |                          |                                    |                          |                        |                 |                                   |                       |
|---------------------------------|------------------------------------------------------|-------------------------------------------|--------------------------|------------------------------------|--------------------------|------------------------|-----------------|-----------------------------------|-----------------------|
| <b>1</b>                        | <b>2</b>                                             | <b>3</b>                                  | <b>4</b>                 | <b>5</b>                           | <b>6</b>                 | <b>7</b>               | <b>8</b>        | <b>9</b>                          | <b>10</b>             |
| Starving and feeling weak/dizzy | Very hungry, irritable, low energy, stomach growling | Pretty hungry, stomach beginning to growl | Beginning to feel hungry | Satisfied. Neither hungry nor full | Slightly/pleasantly full | Slightly uncomfortable | Feeling stuffed | Very uncomfortable. Stomach aches | So full, feeling sick |

**Day 1** Date \_\_\_\_\_

|                                                                                                                                                                                                                                                                                                                                                       |                                                                                                                                                                                                                                                                                                                                                       |
|-------------------------------------------------------------------------------------------------------------------------------------------------------------------------------------------------------------------------------------------------------------------------------------------------------------------------------------------------------|-------------------------------------------------------------------------------------------------------------------------------------------------------------------------------------------------------------------------------------------------------------------------------------------------------------------------------------------------------|
| <p><b>1</b> Time _____<br/>Hunger (1-10) _____<br/>Glucose _____<br/>Did you eat? Yes   No<br/>Comments _____</p> <p><b>2</b> Time _____<br/>Hunger (1-10) _____<br/>Glucose _____<br/>Did you eat? Yes   No<br/>Comments _____</p> <p><b>3</b> Time _____<br/>Hunger (1-10) _____<br/>Glucose _____<br/>Did you eat? Yes   No<br/>Comments _____</p> | <p><b>4</b> Time _____<br/>Hunger (1-10) _____<br/>Glucose _____<br/>Did you eat? Yes   No<br/>Comments _____</p> <p><b>5</b> Time _____<br/>Hunger (1-10) _____<br/>Glucose _____<br/>Did you eat? Yes   No<br/>Comments _____</p> <p><b>6</b> Time _____<br/>Hunger (1-10) _____<br/>Glucose _____<br/>Did you eat? Yes   No<br/>Comments _____</p> |
|-------------------------------------------------------------------------------------------------------------------------------------------------------------------------------------------------------------------------------------------------------------------------------------------------------------------------------------------------------|-------------------------------------------------------------------------------------------------------------------------------------------------------------------------------------------------------------------------------------------------------------------------------------------------------------------------------------------------------|

|                                                                                                                                                                                                                                                                                                                                                       |                                                                                                                                                                                                                                                                                                                                                          |
|-------------------------------------------------------------------------------------------------------------------------------------------------------------------------------------------------------------------------------------------------------------------------------------------------------------------------------------------------------|----------------------------------------------------------------------------------------------------------------------------------------------------------------------------------------------------------------------------------------------------------------------------------------------------------------------------------------------------------|
| <p><b>7</b> Time _____<br/>Hunger (1-10) _____<br/>Glucose _____<br/>Did you eat? Yes   No<br/>Comments _____</p> <p><b>8</b> Time _____<br/>Hunger (1-10) _____<br/>Glucose _____<br/>Did you eat? Yes   No<br/>Comments _____</p> <p><b>9</b> Time _____<br/>Hunger (1-10) _____<br/>Glucose _____<br/>Did you eat? Yes   No<br/>Comments _____</p> | <p><b>10</b> Time _____<br/>Hunger (1-10) _____<br/>Glucose _____<br/>Did you eat? Yes   No<br/>Comments _____</p> <p><b>11</b> Time _____<br/>Hunger (1-10) _____<br/>Glucose _____<br/>Did you eat? Yes   No<br/>Comments _____</p> <p><b>12</b> Time _____<br/>Hunger (1-10) _____<br/>Glucose _____<br/>Did you eat? Yes   No<br/>Comments _____</p> |
|-------------------------------------------------------------------------------------------------------------------------------------------------------------------------------------------------------------------------------------------------------------------------------------------------------------------------------------------------------|----------------------------------------------------------------------------------------------------------------------------------------------------------------------------------------------------------------------------------------------------------------------------------------------------------------------------------------------------------|

8 9

Figure 2. A page spread from the hunger training booklet

1  
2  
3  
4  
5  
6  
7  
8  
9  
10  
11  
12  
13  
14  
15  
16  
17  
18  
19  
20  
21  
22  
23  
24  
25  
26  
27  
28  
29  
30  
31  
32  
33  
34  
35  
36  
37  
38  
39  
40  
41  
42  
43  
44  
45  
46  
47  
48  
49  
50  
51  
52  
53  
54  
55  
56  
57  
58  
59  
60

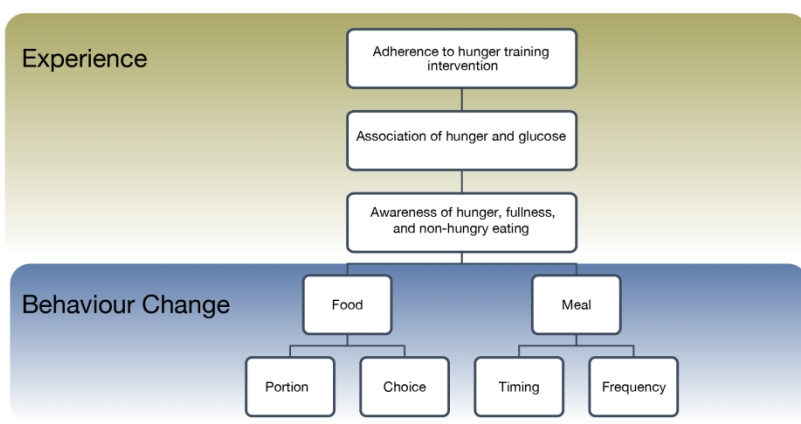

Figure 3. Themes emerging from hunger training pilot study

209x107mm (300 x 300 DPI)

## SUPPLEMENTARY FILE

### Semi-structured interview guide

1. What was it like to measure your **glucose** over the past month?
  - a. Could you tell me something about what you **liked** about measuring your glucose?
  - b. Could you tell me something about what you **disliked** about measuring your glucose?
2. What was it like to **fill in the booklet** over the past month?
  - a. Can you tell something about what you **liked** about filling in the booklet?
  - b. Can you tell something about what you **disliked** about filling in the booklet?
3. Did you see a pattern between your hunger and glucose?
  - a. If no, how much of a problem was this?
  - b. If yes, could you tell a bit more about what you learned?
4. Can you please let me know whether you have **experienced any changes in your behavior** in the past month?
  - a. Do you think this changed because of hunger training?
  - b. You told me something about .... , were there any other changes because of hunger training?
    - i. Possible topics for discussion: routine, number of eating occasions (e.g. number of meals), avoidance of eating due to pain, food choice, awareness of hunger/recognizing when body needs food, previous non-hungry eating (e.g. eating because of routine, emotions, environment), awareness of fullness/satiety (e.g. doesn't have to eat as much as previously thought), awareness of social pressure to eat, physical activity or coping mechanisms (e.g. ways to distract yourself when "hungry" but not allowed to eat).
5. We asked you to measure your glucose every time you felt like eating, and to only eat if your glucose was under your cut-off. How did this work out for you?
  - a. We can imagine this was not always easy, can you tell me why it was sometimes **difficult**?
    - i. Can you please tell me about situations that you **didn't measure** your glucose before eating (if any)?
    - ii. Can you please tell me about situations that your **glucose was too high to eat**, but you ate anyways (if any)?
  - b. Some days it may have **been easier** to follow our instructions than others, can you tell me why?

- 1
  - 2
  - 3
  - 4
  - 5
  - 6
  - 7
  - 8
  - 9
  - 10
  - 11
  - 12
  - 13
  - 14
  - 15
  - 16
  - 17
  - 18
  - 19
  - 20
  - 21
  - 22
  - 23
  - 24
  - 25
  - 26
  - 27
  - 28
  - 29
  - 30
  - 31
  - 32
  - 33
  - 34
  - 35
  - 36
  - 37
  - 38
  - 39
  - 40
  - 41
  - 42
  - 43
  - 44
  - 45
  - 46
  - 47
  - 48
  - 49
  - 50
  - 51
  - 52
  - 53
  - 54
  - 55
  - 56
  - 57
  - 58
  - 59
  - 60
6. Now that you're finished the first month of hunger training, you are no longer going to measure glucose to help you figure out when to eat. You'll continue to fill in the booklet, but only for one week every month. What do you **expect** to happen over the next 5 months?
- a. Do you feel like you have trained yourself to recognize when you are hungry?
  - b. Do yourself to know when to eat without being able to measure your glucose?
7. Do you have any suggestions for us on how we can **improve** hunger training?
- a. Length of time of measuring glucose,
  - b. Communication (e.g. appointments, reminders)
  - c. Equipment
  - d. Booklet/instructions

## Standards for Reporting Qualitative Research (SRQR)\*

<http://www.equator-network.org/reporting-guidelines/srqr/>

Page/line no(s).

### Title and abstract

|                                                                                                                                                                                                                                                              |   |
|--------------------------------------------------------------------------------------------------------------------------------------------------------------------------------------------------------------------------------------------------------------|---|
| <p><b>Title</b> - Concise description of the nature and topic of the study Identifying the study as qualitative or indicating the approach (e.g., ethnography, grounded theory) or data collection methods (e.g., interview, focus group) is recommended</p> | 1 |
| <p><b>Abstract</b> - Summary of key elements of the study using the abstract format of the intended publication; typically includes background, purpose, methods, results, and conclusions</p>                                                               | 2 |

### Introduction

|                                                                                                                                                                     |   |
|---------------------------------------------------------------------------------------------------------------------------------------------------------------------|---|
| <p><b>Problem formulation</b> - Description and significance of the problem/phenomenon studied; review of relevant theory and empirical work; problem statement</p> | 3 |
| <p><b>Purpose or research question</b> - Purpose of the study and specific objectives or questions</p>                                                              | 3 |

### Methods

|                                                                                                                                                                                                                                                                                                                                                                                                             |     |
|-------------------------------------------------------------------------------------------------------------------------------------------------------------------------------------------------------------------------------------------------------------------------------------------------------------------------------------------------------------------------------------------------------------|-----|
| <p><b>Qualitative approach and research paradigm</b> - Qualitative approach (e.g., ethnography, grounded theory, case study, phenomenology, narrative research) and guiding theory if appropriate; identifying the research paradigm (e.g., postpositivist, constructivist/ interpretivist) is also recommended; rationale**</p>                                                                            | 4-5 |
| <p><b>Researcher characteristics and reflexivity</b> - Researchers' characteristics that may influence the research, including personal attributes, qualifications/experience, relationship with participants, assumptions, and/or presuppositions; potential or actual interaction between researchers' characteristics and the research questions, approach, methods, results, and/or transferability</p> | 4   |
| <p><b>Context</b> - Setting/site and salient contextual factors; rationale**</p>                                                                                                                                                                                                                                                                                                                            | 4   |
| <p><b>Sampling strategy</b> - How and why research participants, documents, or events were selected; criteria for deciding when no further sampling was necessary (e.g., sampling saturation); rationale**</p>                                                                                                                                                                                              | 4   |
| <p><b>Ethical issues pertaining to human subjects</b> - Documentation of approval by an appropriate ethics review board and participant consent, or explanation for lack thereof; other confidentiality and data security issues</p>                                                                                                                                                                        | 3   |
| <p><b>Data collection methods</b> - Types of data collected; details of data collection procedures including (as appropriate) start and stop dates of data collection and analysis, iterative process, triangulation of sources/methods, and modification of procedures in response to evolving study findings; rationale**</p>                                                                             | 4   |

|                       |                                                                                                                                                                                                                                                       |     |
|-----------------------|-------------------------------------------------------------------------------------------------------------------------------------------------------------------------------------------------------------------------------------------------------|-----|
| 1<br>2<br>3<br>4<br>5 | <b>Data collection instruments and technologies</b> - Description of instruments (e.g., interview guides, questionnaires) and devices (e.g., audio recorders) used for data collection; if/how the instrument(s) changed over the course of the study | 4   |
| 6<br>7<br>8           | <b>Units of study</b> - Number and relevant characteristics of participants, documents, or events included in the study; level of participation (could be reported in results)                                                                        | 5   |
| 9<br>10<br>11<br>12   | <b>Data processing</b> - Methods for processing data prior to and during analysis, including transcription, data entry, data management and security, verification of data integrity, data coding, and anonymization/de-identification of excerpts    | 4   |
| 13<br>14<br>15<br>16  | <b>Data analysis</b> - Process by which inferences, themes, etc., were identified and developed, including the researchers involved in data analysis; usually references a specific paradigm or approach; rationale**                                 | 4-5 |
| 17<br>18<br>19<br>20  | <b>Techniques to enhance trustworthiness</b> - Techniques to enhance trustworthiness and credibility of data analysis (e.g., member checking, audit trail, triangulation); rationale**                                                                | 4   |

### Results/findings

|                      |                                                                                                                                                                                                   |      |
|----------------------|---------------------------------------------------------------------------------------------------------------------------------------------------------------------------------------------------|------|
| 23<br>24<br>25<br>26 | <b>Synthesis and interpretation</b> - Main findings (e.g., interpretations, inferences, and themes); might include development of a theory or model, or integration with prior research or theory | 5-10 |
| 27<br>28<br>29       | <b>Links to empirical data</b> - Evidence (e.g., quotes, field notes, text excerpts, photographs) to substantiate analytic findings                                                               | 5-10 |

### Discussion

|                                  |                                                                                                                                                                                                                                                                                                                                                                                                             |       |
|----------------------------------|-------------------------------------------------------------------------------------------------------------------------------------------------------------------------------------------------------------------------------------------------------------------------------------------------------------------------------------------------------------------------------------------------------------|-------|
| 32<br>33<br>34<br>35<br>36<br>37 | <b>Integration with prior work, implications, transferability, and contribution(s) to the field</b> - Short summary of main findings; explanation of how findings and conclusions connect to, support, elaborate on, or challenge conclusions of earlier scholarship; discussion of scope of application/generalizability; identification of unique contribution(s) to scholarship in a discipline or field | 10-11 |
| 38<br>39                         | <b>Limitations</b> - Trustworthiness and limitations of findings                                                                                                                                                                                                                                                                                                                                            | 11    |

### Other

|                |                                                                                                                                               |    |
|----------------|-----------------------------------------------------------------------------------------------------------------------------------------------|----|
| 42<br>43<br>44 | <b>Conflicts of interest</b> - Potential sources of influence or perceived influence on study conduct and conclusions; how these were managed | 12 |
| 45<br>46       | <b>Funding</b> - Sources of funding and other support; role of funders in data collection, interpretation, and reporting                      | 12 |

\*The authors created the SRQR by searching the literature to identify guidelines, reporting standards, and critical appraisal criteria for qualitative research; reviewing the reference lists of retrieved sources; and contacting experts to gain feedback. The SRQR aims to improve the transparency of all aspects of qualitative research by providing clear standards for reporting qualitative research.

1  
2  
3  
4  
5  
6  
7  
8  
9  
10  
11  
12  
13  
14  
15  
16  
17  
18  
19  
20  
21  
22  
23  
24  
25  
26  
27  
28  
29  
30  
31  
32  
33  
34  
35  
36  
37  
38  
39  
40  
41  
42  
43  
44  
45  
46  
47  
48  
49  
50  
51  
52  
53  
54  
55  
56  
57  
58  
59  
60

\*\*The rationale should briefly discuss the justification for choosing that theory, approach, method, or technique rather than other options available, the assumptions and limitations implicit in those choices, and how those choices influence study conclusions and transferability. As appropriate, the rationale for several items might be discussed together.

**Reference:**

O'Brien BC, Harris IB, Beckman TJ, Reed DA, Cook DA. **Standards for reporting qualitative research: a synthesis of recommendations.** *Academic Medicine*, Vol. 89, No. 9 / Sept 2014  
DOI: 10.1097/ACM.0000000000000388

For peer review only



# BMJ Open

## **“Am I really hungry?” A qualitative exploration of patients’ experience, adherence, and behaviour change during a pilot Hunger Training intervention**

|                                 |                                                                                                                                                                                                       |
|---------------------------------|-------------------------------------------------------------------------------------------------------------------------------------------------------------------------------------------------------|
| Journal:                        | <i>BMJ Open</i>                                                                                                                                                                                       |
| Manuscript ID                   | bmjopen-2019-032248.R1                                                                                                                                                                                |
| Article Type:                   | Original research                                                                                                                                                                                     |
| Date Submitted by the Author:   | 03-Nov-2019                                                                                                                                                                                           |
| Complete List of Authors:       | de Bruin, Willeminj ; University of Otago, Medicine<br>Ward, Aimee; University of Otago, Medicine<br>Taylor, Rachael; University of Otago, Medicine<br>Jospe, Michelle; University of Otago, Medicine |
| <b>Primary Subject Heading</b>: | Nutrition and metabolism                                                                                                                                                                              |
| Secondary Subject Heading:      | Public health, Qualitative research                                                                                                                                                                   |
| Keywords:                       | NUTRITION & DIETETICS, PUBLIC HEALTH, QUALITATIVE RESEARCH, OBESITY, TRANSLATIONAL RESEARCH, ADHERENCE                                                                                                |
|                                 |                                                                                                                                                                                                       |

SCHOLARONE™  
Manuscripts

1  
2  
3 1 **“Am I really hungry?” A qualitative exploration of patients’ experience,**  
4  
5 2 **adherence, and behaviour change during a pilot Hunger Training intervention**  
6

7 3  
8  
9 4 **Authors:**

10 5 Willemijn E. de Bruin<sup>a</sup>, Aimee L. Ward<sup>a</sup>, Rachael W. Taylor<sup>a</sup> and Michelle R. Jospe<sup>a</sup>  
11  
12 6

13 7 **Author affiliation:**

14 8 <sup>a</sup>Dept of Medicine, University of Otago, PO Box 56, Dunedin, New Zealand, 9054

15 9 w.debruin@otago.ac.nz

16 10 aimee.ward@otago.ac.nz

17 11 rachael.taylor@otago.ac.nz

18 12 michelle.jospe@otago.ac.nz  
19  
20  
21  
22  
23  
24  
25

26 14 **Corresponding author:**

27 15 Dr Michelle R Jospe

28 16 Dept of Medicine, University of Otago, PO Box 56, Dunedin, New Zealand, 9054

29 17 Michelle.jospe@otago.ac.nz, +64 21 037 5002  
30  
31  
32  
33  
34

35 19 3,940 words

36 21 **Data sharing:** Deidentified participant data underlying published results will be  
37 22 available upon reasonable email request to the corresponding author.  
38  
39  
40  
41  
42  
43  
44  
45  
46  
47  
48  
49  
50  
51  
52  
53  
54  
55  
56  
57  
58  
59  
60

## 23 ABSTRACT

24 **Objectives** Hunger training is an intervention designed to teach people to eat according to  
25 their hunger by connecting physical symptoms of appetite with glucose levels. Hunger  
26 training is most effective for weight loss, and improving eating behaviours when  
27 adherence is high. However, adherence is a challenge that should be explored prior to  
28 wider dissemination. The aim of this study was to explore participants' experience, and  
29 self-reported adherence and behaviour change related to hunger training.

30 **Design** A qualitative study, nested within a randomised controlled pilot study of two  
31 different methods of monitoring glucose during hunger training. Semi-structured  
32 interviews were audio-recorded, transcribed verbatim, and analysed thematically using a  
33 phenomenological approach.

34 **Setting** Single centre study with participants recruited from the local area.

35 **Participants** 40 participants began the pilot study and 38 participants (52.6% female)  
36 remained at 1 month and completed interviews.

37 **Results** Most participants felt they were able to match their hunger to their glucose levels  
38 by the end of the intervention. The main adherence barriers were the social pressure to eat,  
39 lack of time, and lack of flexibility in participants' meal schedules. Common adherence  
40 enablers were having a set routine, social support, and accountability. Participants  
41 described increased awareness of hungry versus non-hungry eating and better cognition  
42 of feelings of hunger and satiety as a result of the intervention, which in turn led to  
43 changes of food choice, portion size, and adjusted meal timing and frequency.

44 **Conclusions** Findings show that hunger training is acceptable from a patient perspective,  
45 and results can be used to inform the translation of hunger training programs to health  
46 care settings.

47 **Trial registration** ACTRN12618001257257

### 49 Strengths and limitations of study

- 50 • In-depth interviews allowed for detailed insight into participants' experiences of  
51 hunger training, including adherence barriers and enablers as well as behaviour  
52 change.
- 53 • Adherence to rigorous qualitative methods and analysis provided confidence in  
54 our findings, which are applicable to other lifestyle interventions.
- 55 • While our sample was diverse in terms of sex, age, education, and income, the New  
56 Zealand "university town" setting, as well as the predominantly European  
57 ethnicity of participants may limit extrapolation to other countries and cultures.
- 58 • As with all interviews, there was potential for response biases, however we tried to  
59 limit this by introducing two independent researchers to conduct the interviews.

## 60 INTRODUCTION

61 Weight management is crucial to prevent chronic diseases, however most weight loss diets  
62 prove unsustainable in the long-term.<sup>1,2</sup> A more viable approach may be to teach people to  
63 eat according to their appetite signals, which has been shown to benefit weight  
64 maintenance. However, they have been inconsistently effective for weight loss.<sup>3-7</sup> This may  
65 be because overweight and obesity is linked with difficulty sensing and responding to  
66 physiological hunger and satiety cues, decreasing awareness of appetite.<sup>8-10</sup>

67 To overcome this barrier, an intervention known as hunger training (HT) uses glucose  
68 monitoring as an indicator of hunger to help people gain greater awareness of their  
69 appetite signals, and eat accordingly.<sup>11,12</sup> A limited body of research has found that HT  
70 produces clinically important weight loss, and reduces emotional and external eating,<sup>13-15</sup>  
71 however more research into the efficacy of hunger training and the ability of participants  
72 to adhere to this novel method is needed.

73 The combination of the minimal human resources required for the delivery of HT, and the  
74 potential of sustainable weight management makes it a promising intervention for  
75 primary health care. However, as with most health interventions, adherence is a challenge  
76 that must be investigated prior to wider dissemination.<sup>16,17</sup> Previous work has shown that  
77 benefits of HT are greater for participants with higher adherence, and that only about one-  
78 third of participants sufficiently adhere to experience a clinically beneficial effect.<sup>15</sup> Before  
79 HT can be implemented widely, the underlying mechanisms that contribute to the  
80 effectiveness of HT and the barriers and enablers to adherence must be determined. We  
81 recently undertook a randomised controlled pilot study of two different methods of  
82 monitoring glucose during HT, which included the theoretical approach of  
83 phenomenology to qualitatively examine personal participant experiences to arrive at a  
84 better understanding of how HT affected their behaviour as a whole.<sup>18</sup> The aim of this  
85 manuscript was to qualitatively explore, from the participants' perspective, their overall  
86 experiences with HT, their personal practice in adhering to HT, and any resulting  
87 behaviour change they observed after experiencing HT, in order to inform translation of  
88 HT from research to practice, including whether any differences arose as a consequence of  
89 the different glucose monitoring methods.

## 90 METHODS

### 91 Study design and participants

92 This study was approved by the New Zealand Southern Health and Disability Ethics  
93 Committee (18/STH/105) and was registered with the Australian New Zealand Clinical  
94 Trials Registry (ACTRN12618001257257). All participants provided written informed  
95 consent.

96 Forty adults were recruited from Aug–Oct 2018 from the local community through social  
97 media channels and local advertisement, and were included if they were 18 years of age or

1  
2  
3 98 older, had a body mass index (BMI) of 30 kg/m<sup>2</sup> or higher, and were willing to measure  
4 99 their glucose by fingerprick blood sample and wear a continuous glucose monitor.  
5  
6 100 Exclusion criteria were use of medication that affects weight; pregnancy or breastfeeding;  
7 101 allergy to surgical adhesive; skin changes or disease on the upper arm; or imaging  
8 102 appointments scheduled during the study.

### 103 **Patient and public involvement**

104 No patient or public were involved in the development of the research question,  
105 interpretation of the results, or writing of this document. The results will be disseminated  
106 to participants via email.

### 107 **Randomisation and procedures**

108 Participants were randomised to one of two groups using computerized block  
109 randomisation with random length blocks after stratification for sex. The “fingerpricking”  
110 group measured their capillary glucose from a fingerprick sample by portable glucometer  
111 (Abbott Freestyle Optium Glucose Meter, Australia, Figure 1a). The “scanning” group  
112 used the Freestyle Libre Flash Glucose Monitoring system (Abbott Diabetes Care,  
113 Australia, Figure 1b), which continuously measures interstitial glucose every 15 minutes.  
114 A thin water-resistant sensor was inserted just under the skin on the back of the arm, and  
115 remained there for 14 days, then replaced. When the participant wanted to test their  
116 glucose, they passed a reader over their arm to display current glucose levels. Both HT  
117 groups received the same guidance and support.

### 118 **Hunger training intervention**

119 Participants were instructed to only eat or drink a caloric beverage if their glucose  
120 concentration was below their individualised cut-off, which was based on the average of  
121 fasting glucose from their first two mornings. If participants’ glucose was above their cut-  
122 off value, they were instructed to wait at least 20 minutes before retesting.

123 Alongside glucose monitoring, participants were asked to rate their hunger level (Figure  
124 2), and to note their glucose level and whether they ate, every time they wanted to  
125 consume food or caloric drink. Participants attended three HT appointments. At baseline,  
126 participants were introduced to HT and taught how to measure their glucose, based on  
127 their randomisation. At the day 14 visit, participants could ask questions and discuss  
128 challenges and successes, and were provided with a reading on intuitive eating using  
129 glucose monitoring.<sup>19</sup> On the last visit (at one month), participants returned their  
130 equipment and participated in a semi-structured interview with an independent  
131 interviewer (WEdb or ALW) not previously known to the participants.

### 132 **Data collection**

133 Researchers conducted in-depth interviews with each participant at the last visit. A semi-  
134 structured interview guide (see supplementary file) was developed to explore 1)

1  
2  
3 135 participants' experiences of HT; 2) perceived behaviour change due to HT; 3) self-reported  
4 136 adherence to the intervention; 4) future expectations; and 5) intervention feedback. All  
5  
6 137 interviews were digitally recorded, and professionally transcribed verbatim. Transcripts  
7  
8 138 were processed anonymously. After reviewing the transcribed interviews, it was clear that  
9 139 saturation had been reached and it was deemed unlikely that new topics would arise.<sup>20 21</sup>

## 11 140 **Data analysis**

12  
13 141 The transcribed interviews were systematically scrutinized to guide coding development,  
14 142 key to employing grounded theory in analysing qualitative work.<sup>22 23</sup> Codes were first  
15 143 piloted and refined using a subset of interviews; each interview was coded for themes by  
16 144 two researchers using NVivo.<sup>24</sup> The thematic analyses took an inductive approach and  
17 145 included familiarisation with the interviews and transcripts, development of codes, coding  
18 146 of transcript, and a convening meeting to discuss coded content, to collate codes into  
19 147 themes and to reconsolidate any disagreements.<sup>23 25</sup> Researchers conducting analyses  
20 148 (WEdB, ALW and MRJ) were blind to any participant classifications at the time of  
21 149 analyses.

22  
23  
24  
25  
26 150 The results section includes the use of qualifiers that have been adapted from previous  
27 151 studies.<sup>26-28</sup> When an issue was discussed by 1 to 9 participants, we referred to a 'few'; for  
28 152 between 10 and 20 participants, we referred to 'some'; for between 21 and 30 participants  
29 153 we referred to 'most'; for between 31 and 37 we referred to 'almost all'; and for 38 we  
30 154 referred to 'all'.

## 33 155 **RESULTS**

34  
35 156 The research team conducted a total of 38 semi-structured interviews with HT  
36 157 participants; two participants dropped out of the study before their interview. Participants  
37 158 ranged in age from 20 to 78 years, had an HbA1c between 28 and 100 mmol/mol, and an  
38 159 individualised glucose cut-off between 4.0 and 14.0 mmol/L (Table 1). Participants lost an  
39 160 average of 4 kg (SD 6.7 kg) at six months, with similar results between scanners and  
40 161 fingerprickers.

41 162

42 163

43 164

44 165

45 166

46 167

47 168

48 169

49 170

171

172 **Table 1.** Baseline characteristics of participants

| Variable                                     | All (n=38)   |
|----------------------------------------------|--------------|
| Randomised to scanning, n (%)                | 19 (50.0)    |
| Female, n (%)                                | 20 (52.6)    |
| Age (years)                                  | 45.0 (13.0)  |
| HbA1C (mmol/mol) (median, IQR)               | 37.0 (34-42) |
| Glucose cut-off (mmol/L)                     | 6.1 (1.9)    |
| Diabetes status, n (%)                       |              |
| Non-diabetic                                 | 27 (71.1)    |
| Pre-diabetic                                 | 8 (21.1)     |
| Type 2 diabetes                              | 3 (7.9)      |
| Body mass index (kg/m <sup>2</sup> )         | 38.3 (7.4)   |
| Education, n (%)                             |              |
| School only                                  | 12 (31.6)    |
| Post-secondary                               | 4 (10.5)     |
| University                                   | 22 (57.9)    |
| Ethnicity, n (%) <sup>a</sup>                |              |
| New Zealand European                         | 36 (94.7)    |
| Māori                                        | 4 (10.5)     |
| Samoan                                       | 2 (5.3)      |
| Other                                        | 3 (7.9)      |
| Partnered, n (%)                             | 25 (65.8)    |
| Household income (New Zealand Dollar), n (%) |              |
| <50k                                         | 14 (36.8)    |
| 50-100k                                      | 11 (28.9)    |
| 100-150k                                     | 12 (31.6)    |
| >150k                                        | 1 (2.6)      |
| Depression Anxiety Stress Scale (DASS-21)    |              |
| Stress                                       | 12.2 (8.7)   |
| Depression                                   | 9.1 (9.3)    |
| Anxiety                                      | 7.7 (5.7)    |

173 *Values are mean (standard deviation) unless otherwise indicated. <sup>a</sup>Multiple options are possible*  
 174 *therefore responses surpass 100%.*

175

## 176 **Participants' experiences with hunger training**

### 177 *Glucose measuring experience and self-reported adherence*

178 Participants explained that it was useful to have an objective measure of their hunger; "It  
 179 *was helpful to see an actual concrete measurement of 'Was I actually hungry? Or was I just*  
 180 *imagining that kind of thing?' [...] it was actually something quite tangible."* - #25, scanner. A  
 181 few participants commented that HT increased their self-efficacy; "I was unprepared to feel  
 182 *empowered by taking that modicum of control. So that was really cool.* - #63, scanner.

183 Almost all participants described situations where they were unable to adhere to the HT  
 184 protocol, and ate without measuring their glucose levels or ate when their glucose was  
 185 above their cut-off. Some reasons for not measuring were because they forgot equipment  
 186 or forgot to measure; were too busy; or were in social situations that made measuring  
 187 difficult. Reasons for eating above cut-off included social pressure to eat, feeling extremely  
 188 hungry, a lack of flexibility to eat at different times, illness and eating out of habit.

189 Most participants discussed the social pressure to eat; *"In a dinner situation where you've got*  
190 *to eat when everyone else is eating. You can't not eat, can't just say 'sorry, I'm checking my*  
191 *glucose'."* - #72, scanner. Participants also described the cultural importance of food in their  
192 families or social groups as reasons for not adhering.

193 There was a clear distinction in experiences and adherence barriers between participants  
194 randomized to fingerpricking compared to those who were randomized to scanning. Most  
195 of those who were ambivalent, and all three participants who were outspokenly negative  
196 about their glucose measuring experience, were randomised to fingerpricking. Almost all  
197 fingerprickers addressed the pain and inconvenience of testing, such as spilling blood,  
198 difficulty in obtaining sufficient blood, having to wash hands before pricking and  
199 disposing the lancets safely. A few explained that they were initially hindered by the pain  
200 but that they got used to it over time, whereas others thought that pain got worse. A few  
201 also explained the pain and inconvenience helped them be mindful; *"That pain and*  
202 *inconvenience did help me, it set the routine because it's like ok to eat I have to do this very*  
203 *inconvenient thing and cause myself a little bit of pain, do I really want to go ahead with that, is*  
204 *that chocolate biscuit really worth that and often the answer was no."* - #9, fingerpricker. Those in  
205 the fingerpricking group were more likely to describe social situations in which they did  
206 not adhere since measuring their glucose made them feel self-conscious and a few  
207 expressed worries about being stigmatized.

208 Those who used the scanner were generally more positive about their glucose measuring  
209 experience. Almost all said scanning was quick, easy, discreet, and convenient, which  
210 allowed for frequent checking.

211 For the remaining themes, no clear differences were apparent between participants  
212 randomised to the different methods of glucose measuring.

### 213 ***Booklet experience and self-reported adherence***

214 A few participants explained the booklet helped them discover a pattern between their  
215 hunger and glucose and be more aware of food intake. A few explained how the hunger  
216 scale helped them understand hunger and fullness.

217 A few participants explained they occasionally forgot to complete the booklet, that it was  
218 impractical, and that it was "just another thing to carry around". Hence, some participants  
219 explained that they only completed the booklet retrospectively. Several participants  
220 suggested developing a smartphone app to replace the booklet.

221 A few felt that the hunger scale should be personalized, or reflect feelings instead of  
222 numbers. Participants also talked about additional information that could be included in  
223 the booklet, including exercise and dietary recommendations, mindfulness and adherence  
224 techniques, and coping strategies for cravings.

### 225 ***Adherence enablers***



226 Some participants stated that daily structure and normal routine helped them comply.  
227 Social support and accountability was another adherence enabler for some participants,  
228 specifically that provided by family and friends who helped them stick to the routine of  
229 checking their glucose and eating appropriately. A few mentioned their doctors expressed  
230 interest in the study and were supportive, providing another level of accountability.

231 Others indicated that adherence became easier; *"I think it got easier as time's gone on because  
232 as I was more mindful about eating breakfast and I guess doing preparations for lunch, knowing  
233 what's coming and how to fit it in with the [glucose] levels."* - #37, scanner.

#### 234 ***Association between glucose and hunger***

235 Most participants were able to determine a clear association between their glucose levels  
236 and hunger; *"I noticed that [...] when I was feeling really hungry, stomach growling, that my  
237 glucose was under four, which was like my threshold. I kind of almost got intuitive about it."* – #38,  
238 scanner. Those who were able to detect an association described a learning curve, with the  
239 association became clearer over time; *"Yeah, and I had the data in front of me that just said,  
240 well logically you're not hungry. You don't feel hungry with that grade of 1 to 10, your glucose  
241 says you're not hungry because you've still got obviously some sugars in your system providing  
242 energy, and I just thought 'well alright then, I'll have a drink'. And then I just got in the habit of  
243 doing it and I found that really helpful."* - #39, fingerpricker.

244 A few were unable to recognise an association and felt confused. While there was no clear  
245 delineation between groups regarding the association between glucose levels and hunger,  
246 confusion was slightly more common among fingerprickers. Common reasons for  
247 confusion were when glucose levels were high before breakfast, after physical activity, and  
248 when they felt very hungry. Some recognised that glucose readings were elevated when  
249 they were busy, stressed, or unwell.

#### 250 ***Awareness of hunger***

251 The majority of participants reported that they became better at recognising hunger. This  
252 made HT different from other weight management strategies they had previously  
253 attempted; *"I've tried listening to people, I've tried following routines, I've tried all that sort of  
254 thing and I occasionally lose [a few] kilos and then I go straight back to square one because I don't  
255 know how to... read my body. I didn't know what it felt like to be hungry. I didn't know that the  
256 way I felt was actually what it feels like to be full. So, I was keeping myself constantly full."* - #42,  
257 scanner. The HT scale opened their eyes to the fact there was a continuum of hunger  
258 sensations

259 Some struggled to identify with the provided descriptors of each of the hunger levels on  
260 the hunger scale. A few overcame this by personalising their scale and/or using half  
261 points. However, others referred to initially being unfamiliar with some cues but then  
262 experiencing them for the first time during the study; *"I've been married 11 years and my wife*

1  
2  
3 263 *heard my stomach rumble and she was like 'I've never heard that before!'" – #64, fingerpricker.*  
4 264 Only a few participants felt that HT did not improve their ability to recognise real hunger.

### 7 265 *Awareness of non-hungry eating*

8 266 Almost all participants reported they learned to tell the difference between hungry and  
9 267 non-hungry eating; *"It was interesting to start to find out whether there was an actual need for*  
10 268 *food from the blood glucose reading versus whether it was a mind thing. I was actually quite quick*  
11 269 *to adjust to it and it gave a good chance to understand the feelings of hunger that you get, whether*  
12 270 *it might be physical or psychological, or just the environment you're in."* – #37, scanner. Some  
13 271 were surprised to discover that they regularly ate when they were not hungry; *"I didn't*  
14 272 *think that I would be susceptible, like at the start of the study they talked about eating when you're*  
15 273 *bored, or eating when you're emotional and I totally expected to be above all of that petty human*  
16 274 *[stuff] because I'm intelligent. It was really eye opening, especially in the first two weeks of the*  
17 275 *study, just how programmed or routine a lot of my eating is."* – #63, scanner.

18 276 Once aware of their non-hungry eating, participants generally avoided it; *"If I have*  
19 277 *anything now, even if blood glucose is fine, that's going to affect my ability to have something, a*  
20 278 *meal later on when I'm really hungry and I then my blood glucose would be more than likely too*  
21 279 *high to allow me to eat when I wanted to later on"* – #9, fingerpricker.

22 280 The most popular reason for non-hungry eating was boredom; *"I'd say I was a bored eater.*  
23 281 *Like I'd be at home, what do I want to do? Uh, I don't really know, I'm just walking around the*  
24 282 *kitchen, just open up the pantry for no reason, and [...], I'm here, so I'll grab something."* – #79,  
25 283 fingerpricker. A few turned to food when stressed or upset. Some believed that if they  
26 284 didn't eat regularly, their body would go into "starvation mode"; *"Well, often people tell you*  
27 285 *if you ate too little that you will put your body into starvation mode and then it will hold onto the*  
28 286 *fat."* – #42, scanner.

29 287 In terms of physical symptoms, some realised that they had confused hunger and thirst.  
30 288 Others realised they ate when tired, in order to give them energy. For a few, non-hungry  
31 289 cravings reduced once they stopped responding to them.

32 290 A few mentioned they ate when they were not hungry because of their environment; *"I*  
33 291 *walked down past the café this morning, I went, 'Ah, food'. It was really good to go to my brain,*  
34 292 *'No, you're not hungry, this is just your body pretending'."* – #62, scanner. A lot mentioned they  
35 293 used to eat out of habit or routine, related to time of day; *"Eat when I'm hungry, rather than*  
36 294 *eat because it's 12 o'clock."* – #22, fingerpricker, or activity; *"Have chips and dip and watch the*  
37 295 *rugby"* – #69, scanner.

38 296 Participants developed strategies when faced with triggers. The most common coping  
39 297 mechanism to avoid non-hungry eating was to drink water or another sugar-free  
40 298 beverage. Some diverted themselves with chores, a walk, or other activities. Participants  
41 299 dealt with social eating by planning ahead; *"There's another gathering this Saturday, so if I'm*  
42 300 *going to go and don't feel like I'm really hungry to eat, I can take the food and do a takeaway and*

1  
2  
3 301 say, 'oh I'll take this and I'll have it later'." – #76, scanner. One participant used strategies she  
4 302 used when quitting smoking; "I'd implement the breathing like you would have [when] you were  
5 303 having a cigarette. I would talk to someone or talk to myself if no one was around, 'you know what  
6 304 this is you know that this is a craving, you just have to ride through it.'" – #42, scanner.

9  
10 305 **Awareness of fullness**

11 306 A couple of participants randomised to the scanner connected their physical sensations  
12 307 with their glucose; "I could scan myself within half an hour of a heavy meal and be able to go see  
13 308 'you're full, look what that's done' and show myself that actually this is what your body needs  
14 309 versus what it wants." - #42, scanner. Participants also used the hunger scale to identify their  
15 310 satiety, however, they expressed they were less confident about recognising fullness.

16  
17 311 Some participants became aware of feeling uncomfortable from overeating, especially after  
18 312 their evening meal. A couple of participants noticed their sleep improved after reducing  
19 313 overeating.

20  
21 314 **Behaviour change**

22  
23 315 The main self-reported behaviour changes were changing their portions, food choices, and  
24 316 timing and frequency of meals (Table 2).

25  
26 317

318 **Table 2.** Behaviour changes due to hunger training

| Theme description                                                                                                                                                                                                                                                                                                                                           | Representative quotes                                                                                                                                                                                                                                                                                                                                                                                                                                                                                                                                                                                                                                                                           |
|-------------------------------------------------------------------------------------------------------------------------------------------------------------------------------------------------------------------------------------------------------------------------------------------------------------------------------------------------------------|-------------------------------------------------------------------------------------------------------------------------------------------------------------------------------------------------------------------------------------------------------------------------------------------------------------------------------------------------------------------------------------------------------------------------------------------------------------------------------------------------------------------------------------------------------------------------------------------------------------------------------------------------------------------------------------------------|
| <b>Portion size reduction</b>                                                                                                                                                                                                                                                                                                                               |                                                                                                                                                                                                                                                                                                                                                                                                                                                                                                                                                                                                                                                                                                 |
| Most participants reduced the amount of food they ate at a given meal                                                                                                                                                                                                                                                                                       | <i>"This could show me in a physical way that you're not actually starving yourself eating this small amount. I learned really quickly that actually if I get a six-inch subway sandwich, I'm just as full and satisfied for just as long a time period as I am if I have [the amount] that I'd normally get."</i> - #42 scanner                                                                                                                                                                                                                                                                                                                                                                |
| Some specifically reduced their portions of unhealthy foods, or foods that spiked their glucose                                                                                                                                                                                                                                                             | <i>"Instead of buying a decent size cake of chocolate I bought the little bars and that was because I had in my mind the spike that would then come and associated the spike with what then is happening in your body."</i> - #25, scanner<br><br><i>"I'd actually stop and think before I ate. So in the past I would have my cup of tea and just automatically reach for the biscuit tin. And maybe have two or three, instead of stopping at one. It's like 'I only need that one, I'm fine now'. So definitely changed, my behaviors there. Even just being aware of when I was eating, of having that sensation of fullness, instead of just carrying on eating."</i> - #57, fingerpricker |
| Others reduced their intake in order to be able to eat when desired                                                                                                                                                                                                                                                                                         | <i>"I've noticed that if I'm having less at lunch [...] then I'm able to eat my dinner at dinner time versus having a huge lunch and then my blood sugar is still so high that I couldn't have dinner."</i> - #38, scanner.                                                                                                                                                                                                                                                                                                                                                                                                                                                                     |
| A few participants noticed their evening meal influenced morning glucose levels, often modifying their evening meal to eat breakfast at a convenient time                                                                                                                                                                                                   | <i>"We had a friend round and I had a dessert. I had to wait 20 minutes or longer in the morning. But I don't have 20 minutes in the morning. So, I was like, 'okay, let's not do that'."</i> - #79, fingerpricker.                                                                                                                                                                                                                                                                                                                                                                                                                                                                             |
| <b>Food choice</b>                                                                                                                                                                                                                                                                                                                                          |                                                                                                                                                                                                                                                                                                                                                                                                                                                                                                                                                                                                                                                                                                 |
| Participants from both groups found particular foods delayed their next subsequent meals due to being over their glucose cut-offs, and those wearing the scanner reported seeing a spike in glucose levels after consuming certain foods (or "spiky" foods). People also noticed which foods kept them satisfied for longer, which they viewed as positive. | <i>"It made me acutely aware of what foods lasted me longer before the start growl [stomach growl] level was achieved."</i> - #50, scanner.                                                                                                                                                                                                                                                                                                                                                                                                                                                                                                                                                     |
| Reduced intake of "sugary foods" and "sweet stuff", bread, chips, biscuits, chocolate, cakes, takeaways and fast food, sugar-sweetened beverages (SSBs), and alcohol.                                                                                                                                                                                       | <i>"It was more around the drinking because I take a lot of convincing that things [are] right loaded with sugar and if I can't see it, I'm probably not going to believe a word you say. So, it was good to see it [...] After [I drank] I pricked my finger and saw it did shoot up, I would think a bit and have a look at what I was drinking and what was in it."</i> - #40, fingerpricker.                                                                                                                                                                                                                                                                                                |
| Increased intake of vegetables, salads, homemade meals, nuts, eggs, water, and coffee.                                                                                                                                                                                                                                                                      | <i>"Especially on a day off if I go up into the hills. I tend to bring things like muesli bars and just keep snacking all day, whereas now I'm not doing that. I'm waiting 'til I'm hungry and have a proper sit down. I'm drinking a lot more water, as well."</i> - #20, fingerpricker                                                                                                                                                                                                                                                                                                                                                                                                        |
| Increased planning of meals                                                                                                                                                                                                                                                                                                                                 | <i>"Actually I probably have thought about planning my day out meal wise a little bit more 'cause I'd just grab whatever and just eat till I was full or you know, it used to be I'd come home from work and grab a snack and have dinner some time after that and yeah, I don't snack anymore."</i> - #9, fingerpricker                                                                                                                                                                                                                                                                                                                                                                        |
| <b>Timing and frequency of meals</b>                                                                                                                                                                                                                                                                                                                        |                                                                                                                                                                                                                                                                                                                                                                                                                                                                                                                                                                                                                                                                                                 |
| Most reduced their number of eating occasions by eliminating snacking. The majority of this group changed their habit of grazing to eating a fixed number of meals a day, because they realised that they were not hungry, did not want to delay their next meal, and/or to avoid fingerpricking. Most chose to have a sugar-free beverage                  | <i>I would amalgamate [a snack] into a meal. So, this last weekend we were away so you know, we'd have a handful of chips, one or two crackers, some bits and pieces [...], and then you go, okay well I've had it. Now the old me, prior to this [study], would be having it a bit later on when the blood sugar would still be high and two, I'd probably be having the entire pack - #64, fingerpricker.</i>                                                                                                                                                                                                                                                                                 |

instead of food; a few combined their snack food with their main meal.

For most, monitoring their glucose confirmed their normal morning food pattern. However, some had glucose levels that were too high to eat breakfast at their usual time. For these participants, elevated morning glucose was frustrating. Some ate later, and others ignored their glucose and ate anyway.

*"Because based on my monitoring, I'm pretty good, and I don't need to have breakfast, which was a relief, because I'm not a fan of breakfast to begin with."* - #62, scanner

319 *Note: Themes listed in order of frequency*

### 320 **Future expectations**

321 Almost all participants expressed they were motivated and hopeful about continuing with  
 322 their recent behaviour changes; *"It seems an easy way to do it, 'cause it's not a diet. It's just*  
 323 *eating sensibly and just waiting 'til your body's ready to eat. Rather than just eating for the sake of*  
 324 *eating."* - #20, fingerpricker. A few explained they would have liked to measure their  
 325 glucose for longer to gain confidence about their hunger levels and some (mostly those  
 326 who scanned) expressed concern about being without their equipment. This feeling of  
 327 concern generally revolved around the fact that they would be without immediate  
 328 feedback. On the contrary, other participants were happy and confident to leave their  
 329 equipment behind. A few participants reflected that following HT without equipment  
 330 would be the next step.

### 331 **DISCUSSION**

332 Our use of phenomenology to explore the experience of participants using HT provided  
 333 rich descriptions that aided our understanding of the daily lived experiences of those  
 334 monitoring their glucose on a regular basis. Most participants had a positive experience of  
 335 HT, and were able to match their hunger to their glucose levels by the end of the study,  
 336 which is consistent with other findings<sup>29</sup> and our previous results.<sup>14</sup> While the majority  
 337 found an association between hunger and glucose, some experienced confusion, which is  
 338 likely related to the homeostatic control of glucose.<sup>12</sup>

339 The main adherence barriers of social pressure to eat, lack of time, and lack of flexibility in  
 340 meal schedule, and the main enablers of routine, social support, and accountability, are  
 341 consistent with those of a systematic review of determinants of adherence to lifestyle  
 342 interventions in adults with obesity.<sup>16</sup> Participants realised that they were previously  
 343 unaware of feelings of appetite, supporting the theory that some with overweight/obesity  
 344 have blunted sensations of hunger and satiety.<sup>8-10</sup> Participants primarily changed their  
 345 behaviour by becoming aware of hungry versus non-hungry eating, recognising feelings  
 346 of hunger and satiety, reducing their number of meals, and exploring the effect of different  
 347 types of foods on their glucose. This is in line with a review of mindful and intuitive eating  
 348 interventions wherein participants became more aware of and reduced non-hungry  
 349 eating.<sup>30</sup> Although historically HT enhances recognition of hunger rather than satiety,<sup>29</sup>  
 350 our results indicate our participants felt they learned to recognize feelings of fullness.  
 351 Whether this translated to long-term behaviour change is unknown.

1  
2  
3 352 Participants randomised to use the scanners generally described fewer negative  
4 353 experiences and less adherence barriers, and were more inclined to try different foods to  
5 354 see the effects on their glucose, due to the ease of scanning. However, those randomised to  
6 355 fingerpricking may have become more mindful of their hunger, since they carefully  
7 356 considered their hunger before submitting to the effort and discomfort of fingerpricking.  
8 357 Fingerprickers were more confident returning their glucose measuring equipment,  
9 358 perhaps due to their established awareness of hunger. As suggested by our participants, a  
10 359 mobile app instead of a paper booklet, and including nutrition and exercise  
11 360 recommendations, and strategies to cope with emotional and social eating may increase  
12 361 adherence, and this agrees with current recommendations.<sup>31</sup> Social support and involving  
13 362 family and friends may improve adherence and benefits, as demonstrated elsewhere.<sup>32-34</sup>

14 363 Our analysis was robust; the researchers were blinded for participant characteristics, all  
15 364 transcripts were double-coded, and the results were analysed and interpreted by three  
16 365 researchers. As with all interviews there is potential for response bias, with a chance of  
17 366 study participants providing socially desirable answers to appease researchers.<sup>35</sup> We tried  
18 367 to reduce this by introducing an independent researcher for the interviews. Our study also  
19 368 has some limitations, principally related to the limited diversity obtained in our sample.  
20 369 Our participants were highly educated as recruitment occurred in a university town, and a  
21 370 smaller proportion of participants were diabetic than was anticipated.<sup>36</sup> Anecdotal  
22 371 feedback indicated that diabetic patients were unwilling to be involved in research that  
23 372 might require additional blood glucose testing than was already required by their  
24 373 condition. It is possible that participants reported on HT experiences that were intertwined  
25 374 with their own past struggles with other weight loss programs. Thus it is impossible to  
26 375 know if participants' self-reported experiences here are a result solely of the HT protocol,  
27 376 or exposure to weight management strategies in general. This would be a relevant topic  
28 377 for further research.

29 378 Our interviews allowed insight into how participants undergoing HT felt it influenced  
30 379 their eating behaviour, and suggestions for how to better support participants in  
31 380 establishing healthy eating routines, both of which can be used to inform future HT  
32 381 programs and other healthy eating interventions in both primary care and public health  
33 382 settings.

## 34 383 **DECLARATIONS**

35 384 **Author Contributions:** Conceptualization, W.E.dB., A.L.W., R.W.T. and M.R.J;  
36 385 Methodology, W.E.dB., A.L.W. and M.R.J; Formal Analysis, W.E.dB., A.L.W. and M.R.J;  
37 386 Resources, M.R.J; Data Curation, W.E.dB., A.L.W. and M.R.J; Writing-Original Draft  
38 387 Preparation, W.E.dB and M.R.J; Writing-Review & Editing, W.E.dB., A.L.W., R.W.T. and  
39 388 M.R.J; Visualization, M.R.J; Project Administration, W.E.dB. and M.R.J; Funding  
40 389 Acquisition, R.W.T. and M.R.J.

41 390 **Funding:** This research was supported by a University of Otago Research Grant.

391 **Acknowledgments:** We would like to thank all participants involved in the hunger  
392 training pilot study (ACTRN12618001257257). Thank you to Associate Professor Ben  
393 Wheeler and Dr Sara Boucher for sharing their expertise with the Freestyle Libre Flash  
394 Glucose Monitoring system.

395 **Conflicts of Interest:** The authors declare no conflict of interest.

396 **List of Abbreviations:** BMI: Body Mass Index, DASS-21: Depression Anxiety Stress Scale,  
397 HbA1c: Hemoglobine A1c, HT: Hunger Training, IQR: Inter-Quartile Range, SSBs: Sugar-  
398 Sweetened Beverages.

## 399 REFERENCES

- 400 1. Franz MJ, VanWormer JJ, Crain AL, et al. Weight-Loss Outcomes: A Systematic Review  
401 and Meta-Analysis of Weight-Loss Clinical Trials with a Minimum 1-Year Follow-  
402 Up. *J Am Diet Assoc* 2007;107(10):1755-67. doi: 10.1016/j.jada.2007.07.017
- 403 2. Johnston BC, Kanters S, Bandayrel K, et al. Comparison of Weight Loss Among Named  
404 Diet Programs in Overweight and Obese Adults: A Meta-analysis. *JAMA*  
405 2014;312(9):923-33. doi: 10.1001/jama.2014.10397
- 406 3. Borkoles E, Carroll S, Clough P, et al. Effect of a non-dieting lifestyle randomised control  
407 trial on psychological well-being and weight management in morbidly obese pre-  
408 menopausal women. *Maturitas* 2016;83:51-58. doi: 10.1016/j.maturitas.2015.09.010
- 409 4. Leblanc V, Provencher V, Bégin C, et al. Impact of a Health-At-Every-Size intervention on  
410 changes in dietary intakes and eating patterns in premenopausal overweight  
411 women: Results of a randomized trial. *Clin Nutr* 2012;31(4):481-88. doi:  
412 10.1016/j.clnu.2011.12.013
- 413 5. Provencher V, Bégin C, Tremblay A, et al. Health-At-Every-Size and Eating Behaviors: 1-  
414 Year Follow-Up Results of a Size Acceptance Intervention. *J Am Diet Assoc*  
415 2009;109(11):1854-61. doi: 10.1016/j.jada.2009.08.017
- 416 6. Van Dyke N, Drinkwater EJ. Review Article Relationships between intuitive eating and  
417 health indicators: literature review. *Public Health Nutr* 2014;17(08):1757-66. doi:  
418 10.1017/S1368980013002139
- 419 7. Bacon L, Keim NL, Van Loan MD, et al. Evaluating a 'non-diet' wellness intervention for  
420 improvement of metabolic fitness, psychological well-being and eating and activity  
421 behaviors. *Int J Obes* 2002;26:854. doi: 10.1038/sj.ijo.0802012
- 422 8. Barkeling B, King NA, Naslund E, et al. Characterization of obese individuals who claim  
423 to detect no relationship between their eating pattern and sensations of hunger or  
424 fullness. *Int J Obes* 2007;31(3):435-39. doi: 10.1038/sj.ijo.0803449
- 425 9. Blundell JE, Stubbs RJ, Golding C, et al. Resistance and susceptibility to weight gain:  
426 individual variability in response to a high-fat diet. *Physiol Behav* 2005;86(5):614-22.  
427 doi: 10.1016/j.physbeh.2005.08.052
- 428 10. Drapeau V, Blundell J, Gallant AR, et al. Behavioural and metabolic characterisation of  
429 the low satiety phenotype. *Appetite* 2013;70:67-72. doi: 10.1016/j.appet.2013.05.022
- 430 11. Flint A, Gregersen NT, Glud LL, et al. Associations between postprandial insulin and  
431 blood glucose responses, appetite sensations and energy intake in normal weight  
432 and overweight individuals: a meta-analysis of test meal studies. *Br J Nutr*  
433 2007;98(01):17-25. doi: 10.1017/S000711450768297X

- 1  
2  
3 434 12. Lemmens SG, Martens EA, Kester AD, et al. Changes in gut hormone and glucose  
4 435 concentrations in relation to hunger and fullness. *Am J Clin Nutr* 2011;94(3):717-25.  
5 436 doi: 10.3945/ajcn.110.008631  
6  
7 437 13. Ciampolini M, Lovell-Smith D, Sifone M. Sustained self-regulation of energy intake. Loss  
8 438 of weight in overweight subjects. Maintenance of weight in normal-weight subjects.  
9 439 *Nutr Metab* 2010;7:4. doi: 10.1186/1743-7075-7-4  
10  
11 440 14. Jospe MR, Brown RC, Roy M, et al. Adherence to hunger training using blood glucose  
12 441 monitoring: a feasibility study. *Nutr Metab* 2015;12:22. doi: 10.1186/s12986-015-0017-  
13 442 2  
14  
15 443 15. Jospe MR, Taylor RW, Athens J, et al. Adherence to Hunger Training over 6 Months and  
16 444 the Effect on Weight and Eating Behaviour: Secondary Analysis of a Randomised  
17 445 Controlled Trial. *Nutrients* 2017;9(11):1260.  
18  
19 446 16. Burgess E, Hassmen P, Pumpa KL. Determinants of adherence to lifestyle intervention  
20 447 in adults with obesity: a systematic review. *Clin Obes* 2017;7(3):123-35. doi:  
21 448 10.1111/cob.12183 [published Online First: 2017/03/16]  
22  
23 449 17. Leung AWY, Chan RSM, Sea MMM, et al. An Overview of Factors Associated with  
24 450 Adherence to Lifestyle Modification Programs for Weight Management in Adults.  
25 451 *Int J Environ Res Public Health* 2017;14(8):922.  
26  
27 452 18. Creswell JW, Plano Clark VL. Choosing a mixed method design. Designing and  
28 453 conducting mixed method research. 2nd ed 2011:58-88.  
29  
30 454 19. Bacon L, Matz J. Intuitive Eating: Enjoy Your Food, Respect Your Body. *Diabetes Self-  
31 455 Management*, 2010:44-51.  
32  
33 456 20. Mason M. Sample Size and Saturation in PhD Studies Using Qualitative Interviews.  
34 457 *Forum Qual Soc Res* 2010;11(3) doi: 10.17169/fqs-11.3.1428 [published Online First:  
35 458 2010-08-24]  
36  
37 459 21. Saunders B, Sim J, Kingstone T, et al. Saturation in qualitative research: exploring its  
38 460 conceptualization and operationalization. *Qual Quant* 2018;52(4):1893-907. doi:  
39 461 10.1007/s11135-017-0574-8 [published Online First: 2017/09/14]  
40  
41 462 22. Sandelowski M. Whatever happened to qualitative description? *Res Nurs Health*  
42 463 2000;23(4):334-40. doi: 10.1002/1098-240X(200008)23:4<334::AID-NUR9>3.0.CO;2-G  
43  
44 464 23. Strauss A, Corbin J. Basics of qualitative research: Techniques and procedures for  
45 465 developing grounded theory, 2nd ed. Thousand Oaks, CA, US: Sage Publications,  
46 466 Inc 1998.  
47  
48 467 24. NVivo qualitative data analysis software [program]. 12 version, 2018.  
49  
50 468 25. Thomas DR. A General Inductive Approach for Analyzing Qualitative Evaluation Data.  
51 469 *Am J Eval* 2006;27(2):237-46. doi: 10.1177/1098214005283748  
52  
53 470 26. Sandelowski M. Real qualitative researchers do not count: The use of numbers in  
54 471 qualitative research. *Res Nurs Health* 2001;24(3):230-40. doi: 10.1002/nur.1025  
55  
56 472 27. Van Cauwenberg J, Van Holle V, Simons D, et al. Environmental factors influencing  
57 473 older adults' walking for transportation: a study using walk-along interviews. *Int J  
58 474 Behav Nutr Phys Act* 2012;9(1):85. doi: 10.1186/1479-5868-9-85  
59  
60 475 28. Ward AL, Freeman C, McGee R. The influence of transport on well-being among  
476 teenagers: A photovoice project in New Zealand. *JTH* 2015;2(3):414-22. doi:  
477 10.1016/j.jth.2015.06.004  
478  
479 29. Ciampolini M, Bianchi R. Training to estimate blood glucose and to form associations  
with initial hunger. *Nutr Metab* 2006;3:42. doi: 10.1186/1743-7075-3-42



- 1  
2  
3 480 30. Warren JM, Smith N, Ashwell M. A structured literature review on the role of  
4 481 mindfulness, mindful eating and intuitive eating in changing eating behaviours:  
5 482 effectiveness and associated potential mechanisms. *Nutr Res Rev* 2017;30(2):272-83.  
6 483 doi: 10.1017/S0954422417000154 [published Online First: 2017/07/18]  
7 484 31. The Diabetes Prevention Program (DPP) Research Group. The Diabetes Prevention  
8 485 Program (DPP). *Diabetes Care* 2002;25(12):2165. doi: 10.2337/diacare.25.12.2165  
9 486 32. Lemstra M, Bird Y, Nwankwo C, et al. Weight loss intervention adherence and factors  
10 487 promoting adherence: a meta-analysis. *Patient Prefer Adherence* 2016;10:1547-59. doi:  
11 488 10.2147/PPA.S103649  
12 489 33. Verheijden MW, Bakx JC, van Weel C, et al. Role of social support in lifestyle-focused  
13 490 weight management interventions. *Eur J Clin Nutr* 2005;59:S179. doi:  
14 491 10.1038/sj.ejcn.1602194  
15 492 34. Elfhag K, Rössner S. Who succeeds in maintaining weight loss? A conceptual review of  
16 493 factors associated with weight loss maintenance and weight regain. *Obes Rev*  
17 494 2005;6(1):67-85. doi: 10.1111/j.1467-789X.2005.00170.x  
18 495 35. Stec JA. Bias. In: Lavrakas PJ, ed. *Encyclopedia of Survey Research Methods*. Thousand  
19 496 Oaks, California: Sage Publications, Inc. 2011:57-60.  
20 497 36. Leung MY, Carlsson NP, Colditz GA, et al. The Burden of Obesity on Diabetes in the  
21 498 United States: Medical Expenditure Panel Survey, 2008 to 2012. *Value Health*  
22 499 2017;20(1):77-84. doi: 10.1016/j.jval.2016.08.735

23 500

## 24 501 **FIGURE CAPTIONS**

25 502 **Figure 1.** Glucose measuring equipment, (a) the Freestyle Optium Glucose Meter (Abbott  
26 503 Freestyle Optium Glucose Meter, Australia), test strip and lancet used by the  
27 504 “fingerpricking” group; (b) the Freestyle Libre Flash Glucose Monitoring system (Abbott  
28 505 Diabetes Care, Australia), worn by the “scanner” group.

29 506 **Figure 2.** A page spread from the hunger training booklet



Figure 1. Glucose measuring equipment, (a) the Freestyle Optium Glucose Meter (Abbott Freestyle Optium Glucose Meter, Australia), test strip and lancet used by the "fingerpricking" group; (b) the Freestyle Libre Flash Glucose Monitoring system (Abbott Diabetes Care, Australia), worn by the "scanner" group. Photo by Thirunavukkarasye-Raveendran [CC BY 4.0 (<https://creativecommons.org/licenses/by/4.0>)]

189x133mm (300 x 300 DPI)

1  
2  
3  
4  
5  
6  
7  
8  
9  
10  
11  
12  
13  
14  
15  
16  
17  
18  
19  
20  
21  
22  
23  
24  
25  
26  
27  
28  
29  
30  
31  
32  
33  
34  
35  
36  
37  
38  
39  
40  
41  
42  
43  
44  
45  
46  
47  
48  
49  
50  
51  
52  
53  
54  
55  
56  
57  
58  
59  
60

### The Hunger Scale

|                                 |                                                      |                                           |                          |                                    |                          |                        |                 |                                   |                       |
|---------------------------------|------------------------------------------------------|-------------------------------------------|--------------------------|------------------------------------|--------------------------|------------------------|-----------------|-----------------------------------|-----------------------|
| <b>1</b>                        | <b>2</b>                                             | <b>3</b>                                  | <b>4</b>                 | <b>5</b>                           | <b>6</b>                 | <b>7</b>               | <b>8</b>        | <b>9</b>                          | <b>10</b>             |
| Starving and feeling weak/dizzy | Very hungry, irritable, low energy, stomach growling | Pretty hungry, stomach beginning to growl | Beginning to feel hungry | Satisfied. Neither hungry nor full | Slightly/pleasantly full | Slightly uncomfortable | Feeling stuffed | Very uncomfortable. Stomach aches | So full, feeling sick |

**Day 1** Date \_\_\_\_\_

|                                                                                                                                                                                                                                                                                                                                                       |                                                                                                                                                                                                                                                                                                                                                       |
|-------------------------------------------------------------------------------------------------------------------------------------------------------------------------------------------------------------------------------------------------------------------------------------------------------------------------------------------------------|-------------------------------------------------------------------------------------------------------------------------------------------------------------------------------------------------------------------------------------------------------------------------------------------------------------------------------------------------------|
| <p><b>1</b> Time _____<br/>Hunger (1-10) _____<br/>Glucose _____<br/>Did you eat? Yes   No<br/>Comments _____</p> <p><b>2</b> Time _____<br/>Hunger (1-10) _____<br/>Glucose _____<br/>Did you eat? Yes   No<br/>Comments _____</p> <p><b>3</b> Time _____<br/>Hunger (1-10) _____<br/>Glucose _____<br/>Did you eat? Yes   No<br/>Comments _____</p> | <p><b>4</b> Time _____<br/>Hunger (1-10) _____<br/>Glucose _____<br/>Did you eat? Yes   No<br/>Comments _____</p> <p><b>5</b> Time _____<br/>Hunger (1-10) _____<br/>Glucose _____<br/>Did you eat? Yes   No<br/>Comments _____</p> <p><b>6</b> Time _____<br/>Hunger (1-10) _____<br/>Glucose _____<br/>Did you eat? Yes   No<br/>Comments _____</p> |
|-------------------------------------------------------------------------------------------------------------------------------------------------------------------------------------------------------------------------------------------------------------------------------------------------------------------------------------------------------|-------------------------------------------------------------------------------------------------------------------------------------------------------------------------------------------------------------------------------------------------------------------------------------------------------------------------------------------------------|

|                                                                                                                                                                                                                                                                                                                                                       |                                                                                                                                                                                                                                                                                                                                                          |
|-------------------------------------------------------------------------------------------------------------------------------------------------------------------------------------------------------------------------------------------------------------------------------------------------------------------------------------------------------|----------------------------------------------------------------------------------------------------------------------------------------------------------------------------------------------------------------------------------------------------------------------------------------------------------------------------------------------------------|
| <p><b>7</b> Time _____<br/>Hunger (1-10) _____<br/>Glucose _____<br/>Did you eat? Yes   No<br/>Comments _____</p> <p><b>8</b> Time _____<br/>Hunger (1-10) _____<br/>Glucose _____<br/>Did you eat? Yes   No<br/>Comments _____</p> <p><b>9</b> Time _____<br/>Hunger (1-10) _____<br/>Glucose _____<br/>Did you eat? Yes   No<br/>Comments _____</p> | <p><b>10</b> Time _____<br/>Hunger (1-10) _____<br/>Glucose _____<br/>Did you eat? Yes   No<br/>Comments _____</p> <p><b>11</b> Time _____<br/>Hunger (1-10) _____<br/>Glucose _____<br/>Did you eat? Yes   No<br/>Comments _____</p> <p><b>12</b> Time _____<br/>Hunger (1-10) _____<br/>Glucose _____<br/>Did you eat? Yes   No<br/>Comments _____</p> |
|-------------------------------------------------------------------------------------------------------------------------------------------------------------------------------------------------------------------------------------------------------------------------------------------------------------------------------------------------------|----------------------------------------------------------------------------------------------------------------------------------------------------------------------------------------------------------------------------------------------------------------------------------------------------------------------------------------------------------|

8 9

Figure 2. A page spread from the hunger training booklet

## SUPPLEMENTARY FILE

### Semi-structured interview guide

1. What was it like to measure your **glucose** over the past month?
  - a. Could you tell me something about what you **liked** about measuring your glucose?
  - b. Could you tell me something about what you **disliked** about measuring your glucose?
2. What was it like to **fill in the booklet** over the past month?
  - a. Can you tell something about what you **liked** about filling in the booklet?
  - b. Can you tell something about what you **disliked** about filling in the booklet?
3. Did you see a pattern between your hunger and glucose?
  - a. If no, how much of a problem was this?
  - b. If yes, could you tell a bit more about what you learned?
4. Can you please let me know whether you have **experienced any changes in your behavior** in the past month?
  - a. Do you think this changed because of hunger training?
  - b. You told me something about .... , were there any other changes because of hunger training?
    - i. Possible topics for discussion: routine, number of eating occasions (e.g. number of meals), avoidance of eating due to pain, food choice, awareness of hunger/recognizing when body needs food, previous non-hungry eating (e.g. eating because of routine, emotions, environment), awareness of fullness/satiety (e.g. doesn't have to eat as much as previously thought), awareness of social pressure to eat, physical activity or coping mechanisms (e.g. ways to distract yourself when "hungry" but not allowed to eat).
5. We asked you to measure your glucose every time you felt like eating, and to only eat if your glucose was under your cut-off. How did this work out for you?
  - a. We can imagine this was not always easy, can you tell me why it was sometimes **difficult**?
    - i. Can you please tell me about situations that you **didn't measure** your glucose before eating (if any)?
    - ii. Can you please tell me about situations that your **glucose was too high to eat**, but you ate anyways (if any)?
  - b. Some days it may have **been easier** to follow our instructions than others, can you tell me why?

- 1
  - 2
  - 3
  - 4
  - 5
  - 6
  - 7
  - 8
  - 9
  - 10
  - 11
  - 12
  - 13
  - 14
  - 15
  - 16
  - 17
  - 18
  - 19
  - 20
  - 21
  - 22
  - 23
  - 24
  - 25
  - 26
  - 27
  - 28
  - 29
  - 30
  - 31
  - 32
  - 33
  - 34
  - 35
  - 36
  - 37
  - 38
  - 39
  - 40
  - 41
  - 42
  - 43
  - 44
  - 45
  - 46
  - 47
  - 48
  - 49
  - 50
  - 51
  - 52
  - 53
  - 54
  - 55
  - 56
  - 57
  - 58
  - 59
  - 60
6. Now that you're finished the first month of hunger training, you are no longer going to measure glucose to help you figure out when to eat. You'll continue to fill in the booklet, but only for one week every month. What do you **expect** to happen over the next 5 months?
- a. Do you feel like you have trained yourself to recognize when you are hungry?
  - b. Do yourself to know when to eat without being able to measure your glucose?
7. Do you have any suggestions for us on how we can **improve** hunger training?
- a. Length of time of measuring glucose,
  - b. Communication (e.g. appointments, reminders)
  - c. Equipment
  - d. Booklet/instructions

## Standards for Reporting Qualitative Research (SRQR)\*

<http://www.equator-network.org/reporting-guidelines/srqr/>

Page/line no(s).

### Title and abstract

|                                                                                                                                                                                                                                                              |   |
|--------------------------------------------------------------------------------------------------------------------------------------------------------------------------------------------------------------------------------------------------------------|---|
| <p><b>Title</b> - Concise description of the nature and topic of the study Identifying the study as qualitative or indicating the approach (e.g., ethnography, grounded theory) or data collection methods (e.g., interview, focus group) is recommended</p> | 1 |
| <p><b>Abstract</b> - Summary of key elements of the study using the abstract format of the intended publication; typically includes background, purpose, methods, results, and conclusions</p>                                                               | 2 |

### Introduction

|                                                                                                                                                                     |   |
|---------------------------------------------------------------------------------------------------------------------------------------------------------------------|---|
| <p><b>Problem formulation</b> - Description and significance of the problem/phenomenon studied; review of relevant theory and empirical work; problem statement</p> | 3 |
| <p><b>Purpose or research question</b> - Purpose of the study and specific objectives or questions</p>                                                              | 3 |

### Methods

|                                                                                                                                                                                                                                                                                                                                                                                                             |     |
|-------------------------------------------------------------------------------------------------------------------------------------------------------------------------------------------------------------------------------------------------------------------------------------------------------------------------------------------------------------------------------------------------------------|-----|
| <p><b>Qualitative approach and research paradigm</b> - Qualitative approach (e.g., ethnography, grounded theory, case study, phenomenology, narrative research) and guiding theory if appropriate; identifying the research paradigm (e.g., postpositivist, constructivist/ interpretivist) is also recommended; rationale**</p>                                                                            | 4-5 |
| <p><b>Researcher characteristics and reflexivity</b> - Researchers' characteristics that may influence the research, including personal attributes, qualifications/experience, relationship with participants, assumptions, and/or presuppositions; potential or actual interaction between researchers' characteristics and the research questions, approach, methods, results, and/or transferability</p> | 4   |
| <p><b>Context</b> - Setting/site and salient contextual factors; rationale**</p>                                                                                                                                                                                                                                                                                                                            | 4   |
| <p><b>Sampling strategy</b> - How and why research participants, documents, or events were selected; criteria for deciding when no further sampling was necessary (e.g., sampling saturation); rationale**</p>                                                                                                                                                                                              | 4   |
| <p><b>Ethical issues pertaining to human subjects</b> - Documentation of approval by an appropriate ethics review board and participant consent, or explanation for lack thereof; other confidentiality and data security issues</p>                                                                                                                                                                        | 3   |
| <p><b>Data collection methods</b> - Types of data collected; details of data collection procedures including (as appropriate) start and stop dates of data collection and analysis, iterative process, triangulation of sources/methods, and modification of procedures in response to evolving study findings; rationale**</p>                                                                             | 4   |

|                       |                                                                                                                                                                                                                                                       |     |
|-----------------------|-------------------------------------------------------------------------------------------------------------------------------------------------------------------------------------------------------------------------------------------------------|-----|
| 1<br>2<br>3<br>4<br>5 | <b>Data collection instruments and technologies</b> - Description of instruments (e.g., interview guides, questionnaires) and devices (e.g., audio recorders) used for data collection; if/how the instrument(s) changed over the course of the study | 4   |
| 6<br>7<br>8           | <b>Units of study</b> - Number and relevant characteristics of participants, documents, or events included in the study; level of participation (could be reported in results)                                                                        | 5   |
| 9<br>10<br>11<br>12   | <b>Data processing</b> - Methods for processing data prior to and during analysis, including transcription, data entry, data management and security, verification of data integrity, data coding, and anonymization/de-identification of excerpts    | 4   |
| 13<br>14<br>15<br>16  | <b>Data analysis</b> - Process by which inferences, themes, etc., were identified and developed, including the researchers involved in data analysis; usually references a specific paradigm or approach; rationale**                                 | 4-5 |
| 17<br>18<br>19<br>20  | <b>Techniques to enhance trustworthiness</b> - Techniques to enhance trustworthiness and credibility of data analysis (e.g., member checking, audit trail, triangulation); rationale**                                                                | 4   |

### Results/findings

|                      |                                                                                                                                                                                                   |      |
|----------------------|---------------------------------------------------------------------------------------------------------------------------------------------------------------------------------------------------|------|
| 23<br>24<br>25<br>26 | <b>Synthesis and interpretation</b> - Main findings (e.g., interpretations, inferences, and themes); might include development of a theory or model, or integration with prior research or theory | 5-10 |
| 27<br>28<br>29       | <b>Links to empirical data</b> - Evidence (e.g., quotes, field notes, text excerpts, photographs) to substantiate analytic findings                                                               | 5-10 |

### Discussion

|                                  |                                                                                                                                                                                                                                                                                                                                                                                                             |       |
|----------------------------------|-------------------------------------------------------------------------------------------------------------------------------------------------------------------------------------------------------------------------------------------------------------------------------------------------------------------------------------------------------------------------------------------------------------|-------|
| 32<br>33<br>34<br>35<br>36<br>37 | <b>Integration with prior work, implications, transferability, and contribution(s) to the field</b> - Short summary of main findings; explanation of how findings and conclusions connect to, support, elaborate on, or challenge conclusions of earlier scholarship; discussion of scope of application/generalizability; identification of unique contribution(s) to scholarship in a discipline or field | 10-11 |
| 38<br>39                         | <b>Limitations</b> - Trustworthiness and limitations of findings                                                                                                                                                                                                                                                                                                                                            | 11    |

### Other

|                |                                                                                                                                               |    |
|----------------|-----------------------------------------------------------------------------------------------------------------------------------------------|----|
| 42<br>43<br>44 | <b>Conflicts of interest</b> - Potential sources of influence or perceived influence on study conduct and conclusions; how these were managed | 12 |
| 45<br>46       | <b>Funding</b> - Sources of funding and other support; role of funders in data collection, interpretation, and reporting                      | 12 |

\*The authors created the SRQR by searching the literature to identify guidelines, reporting standards, and critical appraisal criteria for qualitative research; reviewing the reference lists of retrieved sources; and contacting experts to gain feedback. The SRQR aims to improve the transparency of all aspects of qualitative research by providing clear standards for reporting qualitative research.

1  
2  
3  
4  
5  
6  
7  
8  
9  
10  
11  
12  
13  
14  
15  
16  
17  
18  
19  
20  
21  
22  
23  
24  
25  
26  
27  
28  
29  
30  
31  
32  
33  
34  
35  
36  
37  
38  
39  
40  
41  
42  
43  
44  
45  
46  
47  
48  
49  
50  
51  
52  
53  
54  
55  
56  
57  
58  
59  
60

\*\*The rationale should briefly discuss the justification for choosing that theory, approach, method, or technique rather than other options available, the assumptions and limitations implicit in those choices, and how those choices influence study conclusions and transferability. As appropriate, the rationale for several items might be discussed together.

**Reference:**

O'Brien BC, Harris IB, Beckman TJ, Reed DA, Cook DA. **Standards for reporting qualitative research: a synthesis of recommendations.** *Academic Medicine*, Vol. 89, No. 9 / Sept 2014  
DOI: 10.1097/ACM.0000000000000388

For peer review only



# BMJ Open

**“Am I really hungry?” A qualitative exploration of patients’ experience, adherence, and behaviour change during Hunger Training: A pilot study**

|                                 |                                                                                                                                                                                                       |
|---------------------------------|-------------------------------------------------------------------------------------------------------------------------------------------------------------------------------------------------------|
| Journal:                        | <i>BMJ Open</i>                                                                                                                                                                                       |
| Manuscript ID                   | bmjopen-2019-032248.R2                                                                                                                                                                                |
| Article Type:                   | Original research                                                                                                                                                                                     |
| Date Submitted by the Author:   | 24-Nov-2019                                                                                                                                                                                           |
| Complete List of Authors:       | de Bruin, Willelmin ; University of Otago, Medicine<br>Ward, Aimee; University of Otago, Medicine<br>Taylor, Rachael; University of Otago, Medicine<br>Jospe, Michelle; University of Otago, Medicine |
| <b>Primary Subject Heading</b>: | Nutrition and metabolism                                                                                                                                                                              |
| Secondary Subject Heading:      | Public health, Qualitative research                                                                                                                                                                   |
| Keywords:                       | NUTRITION & DIETETICS, PUBLIC HEALTH, QUALITATIVE RESEARCH, OBESITY, TRANSLATIONAL RESEARCH, ADHERENCE                                                                                                |
|                                 |                                                                                                                                                                                                       |

SCHOLARONE™  
Manuscripts

1  
2  
3 1 **“Am I really hungry?” A qualitative exploration of patients’ experience,**  
4  
5 2 **adherence, and behaviour change during Hunger Training: A pilot study**  
6

7 3  
8  
9 4 **Authors:**

10 5 Willemijn E. de Bruin<sup>a</sup>, Aimee L. Ward<sup>a</sup>, Rachael W. Taylor<sup>a</sup> and Michelle R. Jospe<sup>a</sup>  
11  
12 6

13 7 **Author affiliation:**

14 8 <sup>a</sup>Dept of Medicine, University of Otago, PO Box 56, Dunedin, New Zealand, 9054

15 9 w.debruin@otago.ac.nz

16 10 aimee.ward@otago.ac.nz

17 11 rachael.taylor@otago.ac.nz

18 12 michelle.jospe@otago.ac.nz  
19  
20  
21  
22  
23  
24  
25

26 14 **Corresponding author:**

27 15 Dr Michelle R Jospe

28 16 Dept of Medicine, University of Otago, PO Box 56, Dunedin, New Zealand, 9054

29 17 Michelle.jospe@otago.ac.nz, +64 21 037 5002  
30  
31  
32  
33  
34

35 19 3,940 words

36 21 **Data sharing:** Deidentified participant data underlying published results will be  
37 22 available upon reasonable email request to the corresponding author.  
38  
39  
40  
41  
42  
43  
44  
45  
46  
47  
48  
49  
50  
51  
52  
53  
54  
55  
56  
57  
58  
59  
60

## 23 ABSTRACT

24 **Objectives** Hunger training is an intervention designed to teach people to eat according to  
25 their hunger by connecting physical symptoms of appetite with glucose levels. Hunger  
26 training is most effective for weight loss, and improving eating behaviours when  
27 adherence is high. However, adherence is a challenge that should be explored prior to  
28 wider dissemination. The aim of this study was to explore participants' experience, and  
29 self-reported adherence and behaviour change related to hunger training.

30 **Design** A qualitative study, nested within a randomised controlled pilot study of two  
31 different methods of monitoring glucose during hunger training. Semi-structured  
32 interviews were audio-recorded, transcribed verbatim, and analysed thematically using a  
33 phenomenological approach.

34 **Setting** Single centre study with participants recruited from the local area.

35 **Participants** 40 participants began the pilot study and 38 participants (52.6% female)  
36 remained at 1 month and completed interviews.

37 **Results** Most participants felt they were able to match their hunger to their glucose levels  
38 by the end of the intervention. The main adherence barriers were the social pressure to eat,  
39 lack of time, and lack of flexibility in participants' meal schedules. Common adherence  
40 enablers were having a set routine, social support, and accountability. Participants  
41 described increased awareness of hungry versus non-hungry eating and better cognition  
42 of feelings of hunger and satiety as a result of the intervention, which in turn led to  
43 changes of food choice, portion size, and adjusted meal timing and frequency.

44 **Conclusions** Findings show that hunger training is acceptable from a patient perspective,  
45 and results can be used to inform the translation of hunger training programs to health  
46 care settings.

47 **Trial registration** ACTRN12618001257257

### 49 Strengths and limitations of study

- 50 • In-depth interviews allowed for detailed insight into participants' experiences of  
51 hunger training, including adherence barriers and enablers as well as behaviour  
52 change.
- 53 • Adherence to rigorous qualitative methods and analysis provided confidence in  
54 our findings, which are applicable to other lifestyle interventions.
- 55 • While our sample was diverse in terms of sex, age, education, and income, the New  
56 Zealand "university town" setting, as well as the predominantly European  
57 ethnicity of participants may limit extrapolation to other countries and cultures.
- 58 • As with all interviews, there was potential for response biases, however we tried to  
59 limit this by introducing two independent researchers to conduct the interviews.

## 60 INTRODUCTION

61 Weight management is crucial to prevent chronic diseases, however most weight loss diets  
62 prove unsustainable in the long-term.<sup>1,2</sup> A more viable approach may be to teach people to  
63 eat according to their appetite signals, which has been shown to benefit weight  
64 maintenance. However, they have been inconsistently effective for weight loss.<sup>3-7</sup> This may  
65 be because overweight and obesity is linked with difficulty sensing and responding to  
66 physiological hunger and satiety cues, decreasing awareness of appetite.<sup>8-10</sup>

67 To overcome this barrier, an intervention known as hunger training (HT) uses glucose  
68 monitoring as an indicator of hunger to help people gain greater awareness of their  
69 appetite signals, and eat accordingly.<sup>11,12</sup> A limited body of research has found that HT  
70 produces clinically important weight loss, and reduces emotional and external eating,<sup>13-15</sup>  
71 however more research into the efficacy of hunger training and the ability of participants  
72 to adhere to this novel method is needed.

73 The combination of the minimal human resources required for the delivery of HT, and the  
74 potential of sustainable weight management makes it a promising intervention for  
75 primary health care. However, as with most health interventions, adherence is a challenge  
76 that must be investigated prior to wider dissemination.<sup>16,17</sup> Previous work has shown that  
77 benefits of HT are greater for participants with higher adherence, and that only about one-  
78 third of participants sufficiently adhere to experience a clinically beneficial effect.<sup>15</sup> Before  
79 HT can be implemented widely, the underlying mechanisms that contribute to the  
80 effectiveness of HT and the barriers and enablers to adherence must be determined. We  
81 recently undertook a randomised controlled pilot study of two different methods of  
82 monitoring glucose during HT, which included the theoretical approach of  
83 phenomenology to qualitatively examine personal participant experiences to arrive at a  
84 better understanding of how HT affected their behaviour as a whole.<sup>18</sup> The aim of this  
85 manuscript was to qualitatively explore, from the participants' perspective, their overall  
86 experiences with HT, their personal practice in adhering to HT, and any resulting  
87 behaviour change they observed after experiencing HT, in order to inform translation of  
88 HT from research to practice, including whether any differences arose as a consequence of  
89 the different glucose monitoring methods.

## 90 METHODS

### 91 Study design and participants

92 This study was approved by the New Zealand Southern Health and Disability Ethics  
93 Committee (18/STH/105) and was registered with the Australian New Zealand Clinical  
94 Trials Registry (ACTRN12618001257257). All participants provided written informed  
95 consent.

96 Forty adults were recruited from Aug–Oct 2018 from the local community through social  
97 media channels and local advertisement, and were included if they were 18 years of age or

1  
2  
3 98 older, had a body mass index (BMI) of 30 kg/m<sup>2</sup> or higher, and were willing to measure  
4 99 their glucose by fingerprick blood sample and wear a continuous glucose monitor.  
5  
6 100 Exclusion criteria were use of medication that affects weight; pregnancy or breastfeeding;  
7 101 allergy to surgical adhesive; skin changes or disease on the upper arm; or imaging  
8 102 appointments scheduled during the study.

### 103 **Patient and public involvement**

104 No patient or public were involved in the development of the research question,  
105 interpretation of the results, or writing of this document. The results will be disseminated  
106 to participants via email.

### 107 **Randomisation and procedures**

108 Participants were randomised to one of two groups using computerized block  
109 randomisation with random length blocks after stratification for sex. The “fingerpricking”  
110 group measured their capillary glucose from a fingerprick sample by portable glucometer  
111 (Abbott Freestyle Optium Glucose Meter, Australia, Figure 1a). The “scanning” group  
112 used the Freestyle Libre Flash Glucose Monitoring system (Abbott Diabetes Care,  
113 Australia, Figure 1b), which continuously measures interstitial glucose every 15 minutes.  
114 A thin water-resistant sensor was inserted just under the skin on the back of the arm, and  
115 remained there for 14 days, then replaced. When the participant wanted to test their  
116 glucose, they passed a reader over their arm to display current glucose levels. Both HT  
117 groups received the same guidance and support.

### 118 **Hunger training intervention**

119 Participants were instructed to only eat or drink a caloric beverage if their glucose  
120 concentration was below their individualised cut-off, which was based on the average of  
121 fasting glucose from their first two mornings. If participants’ glucose was above their cut-  
122 off value, they were instructed to wait at least 20 minutes before retesting.

123 Alongside glucose monitoring, participants were asked to rate their hunger level (Figure  
124 2), and to note their glucose level and whether they ate, every time they wanted to  
125 consume food or caloric drink. Participants attended three HT appointments. At baseline,  
126 participants were introduced to HT and taught how to measure their glucose, based on  
127 their randomisation. At the day 14 visit, participants could ask questions and discuss  
128 challenges and successes, and were provided with a reading on intuitive eating using  
129 glucose monitoring.<sup>19</sup> On the last visit (at one month), participants returned their  
130 equipment and participated in a semi-structured interview with an independent  
131 interviewer (WEdB or ALW) not previously known to the participants.

### 132 **Data collection**

133 Researchers conducted in-depth interviews with each participant at the last visit. A semi-  
134 structured interview guide (see supplementary file) was developed to explore 1)

1  
2  
3 135 participants' experiences of HT; 2) perceived behaviour change due to HT; 3) self-reported  
4 136 adherence to the intervention; 4) future expectations; and 5) intervention feedback. All  
5  
6 137 interviews were digitally recorded, and professionally transcribed verbatim. Transcripts  
7  
8 138 were processed anonymously. After reviewing the transcribed interviews, it was clear that  
9 139 saturation had been reached and it was deemed unlikely that new topics would arise.<sup>20 21</sup>

## 11 140 **Data analysis**

12  
13 141 The transcribed interviews were systematically scrutinized to guide coding development,  
14 142 key to employing grounded theory in analysing qualitative work.<sup>22 23</sup> Codes were first  
15 143 piloted and refined using a subset of interviews; each interview was coded for themes by  
16 144 two researchers using NVivo.<sup>24</sup> The thematic analyses took an inductive approach and  
17 145 included familiarisation with the interviews and transcripts, development of codes, coding  
18 146 of transcript, and a convening meeting to discuss coded content, to collate codes into  
19 147 themes and to reconsolidate any disagreements.<sup>23 25</sup> Researchers conducting analyses  
20 148 (WEdB, ALW and MRJ) were blind to any participant classifications at the time of  
21 149 analyses.

22  
23  
24  
25  
26 150 The results section includes the use of qualifiers that have been adapted from previous  
27 151 studies.<sup>26-28</sup> When an issue was discussed by 1 to 9 participants, we referred to a 'few'; for  
28 152 between 10 and 20 participants, we referred to 'some'; for between 21 and 30 participants  
29 153 we referred to 'most'; for between 31 and 37 we referred to 'almost all'; and for 38 we  
30 154 referred to 'all'.

## 33 155 **RESULTS**

34  
35 156 The research team conducted a total of 38 semi-structured interviews with HT  
36 157 participants; two participants dropped out of the study before their interview. Participants  
37 158 ranged in age from 20 to 78 years, had an HbA1c between 28 and 100 mmol/mol, and an  
38 159 individualised glucose cut-off between 4.0 and 14.0 mmol/L (Table 1). Participants lost an  
39 160 average of 4 kg (SD 6.7 kg) at six months, with similar results between scanners and  
40 161 fingerprickers.

41 162

42 163

43 164

44 165

45 166

46 167

47 168

48 169

49 170

171

172 **Table 1.** Baseline characteristics of participants

| Variable                                     | All (n=38)   |
|----------------------------------------------|--------------|
| Randomised to scanning, n (%)                | 19 (50.0)    |
| Female, n (%)                                | 20 (52.6)    |
| Age (years)                                  | 45.0 (13.0)  |
| HbA1C (mmol/mol) (median, IQR)               | 37.0 (34-42) |
| Glucose cut-off (mmol/L)                     | 6.1 (1.9)    |
| Diabetes status, n (%)                       |              |
| Non-diabetic                                 | 27 (71.1)    |
| Pre-diabetic                                 | 8 (21.1)     |
| Type 2 diabetes                              | 3 (7.9)      |
| Body mass index (kg/m <sup>2</sup> )         | 38.3 (7.4)   |
| Education, n (%)                             |              |
| School only                                  | 12 (31.6)    |
| Post-secondary                               | 4 (10.5)     |
| University                                   | 22 (57.9)    |
| Ethnicity, n (%) <sup>a</sup>                |              |
| New Zealand European                         | 36 (94.7)    |
| Māori                                        | 4 (10.5)     |
| Samoan                                       | 2 (5.3)      |
| Other                                        | 3 (7.9)      |
| Partnered, n (%)                             | 25 (65.8)    |
| Household income (New Zealand Dollar), n (%) |              |
| <50k                                         | 14 (36.8)    |
| 50-100k                                      | 11 (28.9)    |
| 100-150k                                     | 12 (31.6)    |
| >150k                                        | 1 (2.6)      |
| Depression Anxiety Stress Scale (DASS-21)    |              |
| Stress                                       | 12.2 (8.7)   |
| Depression                                   | 9.1 (9.3)    |
| Anxiety                                      | 7.7 (5.7)    |

173 *Values are mean (standard deviation) unless otherwise indicated. <sup>a</sup>Multiple options are possible*  
 174 *therefore responses surpass 100%.*

175

## 176 **Participants' experiences with hunger training**

### 177 *Glucose measuring experience and self-reported adherence*

178 Participants explained that it was useful to have an objective measure of their hunger; "It  
 179 *was helpful to see an actual concrete measurement of 'Was I actually hungry? Or was I just*  
 180 *imagining that kind of thing?' [...] it was actually something quite tangible."* - #25, female,  
 181 *scanner. A few participants commented that HT increased their self-efficacy; "I was*  
 182 *unprepared to feel empowered by taking that modicum of control. So that was really cool.* - #63,  
 183 *male, scanner.*

184 Almost all participants described situations where they were unable to adhere to the HT  
 185 protocol, and ate without measuring their glucose levels or ate when their glucose was  
 186 above their cut-off. Some reasons for not measuring were because they forgot equipment  
 187 or forgot to measure; were too busy; or were in social situations that made measuring  
 188 difficult. Reasons for eating above cut-off included social pressure to eat, feeling extremely  
 189 hungry, a lack of flexibility to eat at different times, illness and eating out of habit.

1  
2  
3 190 Most participants discussed the social pressure to eat; *"In a dinner situation where you've got*  
4 191 *to eat when everyone else is eating. You can't not eat, can't just say 'sorry, I'm checking my*  
5 192 *glucose'."* - #72, male, scanner. Participants also described the cultural importance of food in  
6 193 their families or social groups as reasons for not adhering.

9 194 There was a clear distinction in experiences and adherence barriers between participants  
10 195 randomized to fingerpricking compared to those who were randomized to scanning. Most  
11 196 of those who were ambivalent, and all three participants who were outspokenly negative  
12 197 about their glucose measuring experience, were randomised to fingerpricking. Almost all  
13 198 fingerprickers addressed the pain and inconvenience of testing, such as spilling blood,  
14 199 difficulty in obtaining sufficient blood, having to wash hands before pricking and  
15 200 disposing the lancets safely. A few explained that they were initially hindered by the pain  
16 201 but that they got used to it over time, whereas others thought that pain got worse. A few  
17 202 also explained the pain and inconvenience helped them be mindful; *"That pain and*  
18 203 *inconvenience did help me, it set the routine because it's like ok to eat I have to do this very*  
19 204 *inconvenient thing and cause myself a little bit of pain, do I really want to go ahead with that, is*  
20 205 *that chocolate biscuit really worth that and often the answer was no."* - #9, female, fingerpricker.  
21 206 Those in the fingerpricking group were more likely to describe social situations in which  
22 207 they did not adhere since measuring their glucose made them feel self-conscious and a few  
23 208 expressed worries about being stigmatized.

24 209 Those who used the scanner were generally more positive about their glucose measuring  
25 210 experience. Almost all said scanning was quick, easy, discreet, and convenient, which  
26 211 allowed for frequent checking.

27 212 For the remaining themes, no clear differences were apparent between participants  
28 213 randomised to the different methods of glucose measuring.

#### 29 214 ***Booklet experience and self-reported adherence***

30 215 A few participants explained the booklet helped them discover a pattern between their  
31 216 hunger and glucose and be more aware of food intake. A few explained how the hunger  
32 217 scale helped them understand hunger and fullness.

33 218 A few participants explained they occasionally forgot to complete the booklet, that it was  
34 219 impractical, and that it was "just another thing to carry around". Hence, some participants  
35 220 explained that they only completed the booklet retrospectively. Several participants  
36 221 suggested developing a smartphone app to replace the booklet.

37 222 A few felt that the hunger scale should be personalized, or reflect feelings instead of  
38 223 numbers. Participants also talked about additional information that could be included in  
39 224 the booklet, including exercise and dietary recommendations, mindfulness and adherence  
40 225 techniques, and coping strategies for cravings.

#### 41 226 ***Adherence enablers***



227 Some participants stated that daily structure and normal routine helped them comply.  
228 Social support and accountability was another adherence enabler for some participants,  
229 specifically that provided by family and friends who helped them stick to the routine of  
230 checking their glucose and eating appropriately. A few mentioned their doctors expressed  
231 interest in the study and were supportive, providing another level of accountability.

232 Others indicated that adherence became easier; *"I think it got easier as time's gone on because  
233 as I was more mindful about eating breakfast and I guess doing preparations for lunch, knowing  
234 what's coming and how to fit it in with the [glucose] levels."* - #37, male, scanner.

### 235 ***Association between glucose and hunger***

236 Most participants were able to determine a clear association between their glucose levels  
237 and hunger; *"I noticed that [...] when I was feeling really hungry, stomach growling, that my  
238 glucose was under four, which was like my threshold. I kind of almost got intuitive about it."* - #38,  
239 female, scanner. Those who were able to detect an association described a learning curve,  
240 with the association became clearer over time; *"Yeah, and I had the data in front of me that just  
241 said, well logically you're not hungry. You don't feel hungry with that grade of 1 to 10, your  
242 glucose says you're not hungry because you've still got obviously some sugars in your system  
243 providing energy, and I just thought 'well alright then, I'll have a drink'. And then I just got in the  
244 habit of doing it and I found that really helpful."* - #39, female, fingerpricker.

245 A few were unable to recognise an association and felt confused. While there was no clear  
246 delineation between groups regarding the association between glucose levels and hunger,  
247 confusion was slightly more common among fingerprickers. Common reasons for  
248 confusion were when glucose levels were high before breakfast, after physical activity, and  
249 when they felt very hungry. Some recognised that glucose readings were elevated when  
250 they were busy, stressed, or unwell.

### 251 ***Awareness of hunger***

252 The majority of participants reported that they became better at recognising hunger. This  
253 made HT different from other weight management strategies they had previously  
254 attempted; *"I've tried listening to people, I've tried following routines, I've tried all that sort of  
255 thing and I occasionally lose [a few] kilos and then I go straight back to square one because I don't  
256 know how to... read my body. I didn't know what it felt like to be hungry. I didn't know that the  
257 way I felt was actually what it feels like to be full. So, I was keeping myself constantly full."* - #42,  
258 female, scanner. The HT scale opened their eyes to the fact there was a continuum of hunger  
259 sensations

260 Some struggled to identify with the provided descriptors of each of the hunger levels on  
261 the hunger scale. A few overcame this by personalising their scale and/or using half  
262 points. However, others referred to initially being unfamiliar with some cues but then  
263 experiencing them for the first time during the study; *"I've been married 11 years and my wife  
264 heard my stomach rumble and she was like 'I've never heard that before!'"* - #64, male,

1  
2  
3 265 *fingerpricker*. Only a few participants felt that HT did not improve their ability to recognise  
4 266 real hunger.

### 7 267 ***Awareness of non-hungry eating***

8 268 Almost all participants reported they learned to tell the difference between hungry and  
9 269 non-hungry eating; *"It was interesting to start to find out whether there was an actual need for*  
11 270 *food from the blood glucose reading versus whether it was a mind thing. I was actually quite quick*  
12 271 *to adjust to it and it gave a good chance to understand the feelings of hunger that you get, whether*  
14 272 *it might be physical or psychological, or just the environment you're in."* – #37, male, scanner.

15 273 Some were surprised to discover that they regularly ate when they were not hungry; *"I*  
17 274 *didn't think that I would be susceptible, like at the start of the study they talked about eating when*  
18 275 *you're bored, or eating when you're emotional and I totally expected to be above all of that petty*  
19 276 *human [stuff] because I'm intelligent. It was really eye opening, especially in the first two weeks of*  
21 277 *the study, just how programmed or routine a lot of my eating is."* – #63, male, scanner.

23 278 Once aware of their non-hungry eating, participants generally avoided it; *"If I have*  
24 279 *anything now, even if blood glucose is fine, that's going to affect my ability to have something, a*  
25 280 *meal later on when I'm really hungry and I then my blood glucose would be more than likely too*  
26 281 *high to allow me to eat when I wanted to later on"* – #9, female, fingerpricker.

29 282 The most popular reason for non-hungry eating was boredom; *"I'd say I was a bored eater.*  
30 283 *Like I'd be at home, what do I want to do? Uh, I don't really know, I'm just walking around the*  
31 284 *kitchen, just open up the pantry for no reason, and [...], I'm here, so I'll grab something."* – #79,  
33 285 *male, fingerpricker*. A few turned to food when stressed or upset. Some believed that if they  
35 286 didn't eat regularly, their body would go into "starvation mode"; *"Well, often people tell you*  
36 287 *if you ate too little that you will put your body into starvation mode and then it will hold onto the*  
37 288 *fat."* – #42, female, scanner.

39 289 In terms of physical symptoms, some realised that they had confused hunger and thirst.  
40 290 Others realised they ate when tired, in order to give them energy. For a few, non-hungry  
41 291 cravings reduced once they stopped responding to them.

44 292 A few mentioned they ate when they were not hungry because of their environment; *"I*  
45 293 *walked down past the café this morning, I went, 'Ah, food'. It was really good to go to my brain,*  
46 294 *'No, you're not hungry, this is just your body pretending'."* – #62, female, scanner. A lot  
47 295 mentioned they used to eat out of habit or routine, related to time of day; *"Eat when I'm*  
49 296 *hungry, rather than eat because it's 12 o'clock."* – #22, female, fingerpricker, or activity; *"Have*  
50 297 *chips and dip and watch the rugby"* – #69, male, scanner.

53 298 Participants developed strategies when faced with triggers. The most common coping  
54 299 mechanism to avoid non-hungry eating was to drink water or another sugar-free  
55 300 beverage. Some diverted themselves with chores, a walk, or other activities. Participants  
56 301 dealt with social eating by planning ahead; *"There's another gathering this Saturday, so if I'm*  
57 302 *going to go and don't feel like I'm really hungry to eat, I can take the food and do a takeaway and*

1  
2  
3 303 say, 'oh I'll take this and I'll have it later'." – #76, male, scanner. One participant used strategies  
4 304 she used when quitting smoking; "I'd implement the breathing like you would have [when] you  
5 305 were having a cigarette. I would talk to someone or talk to myself if no one was around, 'you know  
6 306 what this is you know that this is a craving, you just have to ride through it.'" – #42, female,  
7  
8 307 scanner.

### 11 308 *Awareness of fullness*

12  
13 309 A couple of participants randomised to the scanner connected their physical sensations  
14 310 with their glucose; "I could scan myself within half an hour of a heavy meal and be able to go see  
15 311 'you're full, look what that's done' and show myself that actually this is what your body needs  
16 312 versus what it wants." - #42, female, scanner. Participants also used the hunger scale to  
17 313 identify their satiety, however, they expressed they were less confident about recognising  
18 314 fullness.

19  
20  
21  
22 315 Some participants became aware of feeling uncomfortable from overeating, especially after  
23 316 their evening meal. A couple of participants noticed their sleep improved after reducing  
24 317 overeating.

### 27 318 **Behaviour change**

28  
29 319 The main self-reported behaviour changes were changing their portions, food choices, and  
30 320 timing and frequency of meals (Table 2).

31  
32 321  
33  
34  
35  
36  
37  
38  
39  
40  
41  
42  
43  
44  
45  
46  
47  
48  
49  
50  
51  
52  
53  
54  
55  
56  
57  
58  
59  
60

322 **Table 2.** Behaviour changes due to hunger training

| Theme description                                                                                                                                                                                                                                                                                                                                           | Representative quotes                                                                                                                                                                                                                                                                                                                                                                                                                                                                                                                                                                                                                                                                                           |
|-------------------------------------------------------------------------------------------------------------------------------------------------------------------------------------------------------------------------------------------------------------------------------------------------------------------------------------------------------------|-----------------------------------------------------------------------------------------------------------------------------------------------------------------------------------------------------------------------------------------------------------------------------------------------------------------------------------------------------------------------------------------------------------------------------------------------------------------------------------------------------------------------------------------------------------------------------------------------------------------------------------------------------------------------------------------------------------------|
| <b>Portion size reduction</b>                                                                                                                                                                                                                                                                                                                               |                                                                                                                                                                                                                                                                                                                                                                                                                                                                                                                                                                                                                                                                                                                 |
| Most participants reduced the amount of food they ate at a given meal                                                                                                                                                                                                                                                                                       | <i>"This could show me in a physical way that you're not actually starving yourself eating this small amount. I learned really quickly that actually if I get a six-inch subway sandwich, I'm just as full and satisfied for just as long a time period as I am if I have [the amount] that I'd normally get."</i> - #42, female, scanner                                                                                                                                                                                                                                                                                                                                                                       |
| Some specifically reduced their portions of unhealthy foods, or foods that spiked their glucose                                                                                                                                                                                                                                                             | <i>"Instead of buying a decent size cake of chocolate I bought the little bars and that was because I had in my mind the spike that would then come and associated the spike with what then is happening in your body."</i> - #25, female, scanner<br><br><i>"I'd actually stop and think before I ate. So in the past I would have my cup of tea and just automatically reach for the biscuit tin. And maybe have two or three, instead of stopping at one. It's like 'I only need that one, I'm fine now'. So definitely changed, my behaviors there. Even just being aware of when I was eating, of having that sensation of fullness, instead of just carrying on eating."</i> - #57, female, fingerpricker |
| Others reduced their intake in order to be able to eat when desired                                                                                                                                                                                                                                                                                         | <i>"I've noticed that if I'm having less at lunch [...] then I'm able to eat my dinner at dinner time versus having a huge lunch and then my blood sugar is still so high that I couldn't have dinner."</i> - #38, female, scanner.                                                                                                                                                                                                                                                                                                                                                                                                                                                                             |
| A few participants noticed their evening meal influenced morning glucose levels, often modifying their evening meal to eat breakfast at a convenient time                                                                                                                                                                                                   | <i>"We had a friend round and I had a dessert. I had to wait 20 minutes or longer in the morning. But I don't have 20 minutes in the morning. So, I was like, 'okay, let's not do that'."</i> - #79, female, fingerpricker.                                                                                                                                                                                                                                                                                                                                                                                                                                                                                     |
| <b>Food choice</b>                                                                                                                                                                                                                                                                                                                                          |                                                                                                                                                                                                                                                                                                                                                                                                                                                                                                                                                                                                                                                                                                                 |
| Participants from both groups found particular foods delayed their next subsequent meals due to being over their glucose cut-offs, and those wearing the scanner reported seeing a spike in glucose levels after consuming certain foods (or "spiky" foods). People also noticed which foods kept them satisfied for longer, which they viewed as positive. | <i>"It made me acutely aware of what foods lasted me longer before the start growl [stomach growl] level was achieved."</i> - #50, male, scanner.                                                                                                                                                                                                                                                                                                                                                                                                                                                                                                                                                               |
| Reduced intake of "sugary foods" and "sweet stuff", bread, chips, biscuits, chocolate, cakes, takeaways and fast food, sugar-sweetened beverages (SSBs), and alcohol.                                                                                                                                                                                       | <i>"It was more around the drinking because I take a lot of convincing that things [are] right loaded with sugar and if I can't see it, I'm probably not going to believe a word you say. So, it was good to see it [...] After [I drank] I pricked my finger and saw it did shoot up, I would think a bit and have a look at what I was drinking and what was in it."</i> - #40, female, fingerpricker.                                                                                                                                                                                                                                                                                                        |
| Increased intake of vegetables, salads, homemade meals, nuts, eggs, water, and coffee.                                                                                                                                                                                                                                                                      | <i>"Especially on a day off if I go up into the hills. I tend to bring things like muesli bars and just keep snacking all day, whereas now I'm not doing that. I'm waiting 'til I'm hungry and have a proper sit down. I'm drinking a lot more water, as well."</i> - #20, male, fingerpricker                                                                                                                                                                                                                                                                                                                                                                                                                  |
| Increased planning of meals                                                                                                                                                                                                                                                                                                                                 | <i>"Actually I probably have thought about planning my day out meal wise a little bit more 'cause I'd just grab whatever and just eat till I was full or you know, it used to be I'd come home from work and grab a snack and have dinner some time after that and yeah, I don't snack anymore."</i> - #9, female, fingerpricker                                                                                                                                                                                                                                                                                                                                                                                |
| <b>Timing and frequency of meals</b>                                                                                                                                                                                                                                                                                                                        |                                                                                                                                                                                                                                                                                                                                                                                                                                                                                                                                                                                                                                                                                                                 |
| Most reduced their number of eating occasions by eliminating snacking. The majority of this group changed their habit of grazing to eating a fixed number of meals a day, because they realised that they were not hungry, did not want to delay their next meal, and/or to avoid fingerpricking. Most chose to have a sugar-free beverage                  | <i>I would amalgamate [a snack] into a meal. So, this last weekend we were away so you know, we'd have a handful of chips, one or two crackers, some bits and pieces [...], and then you go, okay well I've had it. Now the old me, prior to this [study], would be having it a bit later on when the blood sugar would still be high and two, I'd</i>                                                                                                                                                                                                                                                                                                                                                          |

instead of food; a few combined their snack food with their main meal.

*probably be having the entire pack – #64, male, fingerpricker.*

For most, monitoring their glucose confirmed their normal morning food pattern. However, some had glucose levels that were too high to eat breakfast at their usual time. For these participants, elevated morning glucose was frustrating. Some ate later, and others ignored their glucose and ate anyway.

*“Because based on my monitoring, I’m pretty good, and I don’t need to have breakfast, which was a relief, because I’m not a fan of breakfast to begin with.” - #62, female, scanner*

323 *Note: Themes listed in order of frequency*

### 324 **Future expectations**

325 Almost all participants expressed they were motivated and hopeful about continuing with  
 326 their recent behaviour changes; *“It seems an easy way to do it, ’cause it’s not a diet. It’s just*  
 327 *eating sensibly and just waiting ’til your body’s ready to eat. Rather than just eating for the sake of*  
 328 *eating.” - #20, male, fingerpricker.* A few explained they would have liked to measure their  
 329 glucose for longer to gain confidence about their hunger levels and some (mostly those  
 330 who scanned) expressed concern about being without their equipment. This feeling of  
 331 concern generally revolved around the fact that they would be without immediate  
 332 feedback. On the contrary, other participants were happy and confident to leave their  
 333 equipment behind. A few participants reflected that following HT without equipment  
 334 would be the next step.

### 335 **DISCUSSION**

336 Our use of phenomenology to explore the experience of participants using HT provided  
 337 rich descriptions that aided our understanding of the daily lived experiences of those  
 338 monitoring their glucose on a regular basis. Most participants had a positive experience of  
 339 HT, and were able to match their hunger to their glucose levels by the end of the study,  
 340 which is consistent with other findings<sup>29</sup> and our previous results.<sup>14</sup> While the majority  
 341 found an association between hunger and glucose, some experienced confusion, which is  
 342 likely related to the homeostatic control of glucose.<sup>12</sup>

343 The main adherence barriers of social pressure to eat, lack of time, and lack of flexibility in  
 344 meal schedule, and the main enablers of routine, social support, and accountability, are  
 345 consistent with those of a systematic review of determinants of adherence to lifestyle  
 346 interventions in adults with obesity.<sup>16</sup> Participants realised that they were previously  
 347 unaware of feelings of appetite, supporting the theory that some with overweight/obesity  
 348 have blunted sensations of hunger and satiety.<sup>8-10</sup> Participants primarily changed their  
 349 behaviour by becoming aware of hungry versus non-hungry eating, recognising feelings  
 350 of hunger and satiety, reducing their number of meals, and exploring the effect of different  
 351 types of foods on their glucose. This is in line with a review of mindful and intuitive eating  
 352 interventions wherein participants became more aware of and reduced non-hungry  
 353 eating.<sup>30</sup> Although historically HT enhances recognition of hunger rather than satiety,<sup>29</sup>  
 354 our results indicate our participants felt they learned to recognize feelings of fullness.  
 355 Whether this translated to long-term behaviour change is unknown.

1  
2  
3 356 Participants randomised to use the scanners generally described fewer negative  
4 357 experiences and less adherence barriers, and were more inclined to try different foods to  
5 358 see the effects on their glucose, due to the ease of scanning. However, those randomised to  
6 359 fingerpricking may have become more mindful of their hunger, since they carefully  
7 360 considered their hunger before submitting to the effort and discomfort of fingerpricking.  
8 361 Fingerprickers were more confident returning their glucose measuring equipment,  
9 362 perhaps due to their established awareness of hunger. As suggested by our participants, a  
10 363 mobile app instead of a paper booklet, and including nutrition and exercise  
11 364 recommendations, and strategies to cope with emotional and social eating may increase  
12 365 adherence, and this agrees with current recommendations.<sup>31</sup> Social support and involving  
13 366 family and friends may improve adherence and benefits, as demonstrated elsewhere.<sup>32-34</sup>

14 367 Our analysis was robust; the researchers were blinded for participant characteristics, all  
15 368 transcripts were double-coded, and the results were analysed and interpreted by three  
16 369 researchers. As with all interviews there is potential for response bias, with a chance of  
17 370 study participants providing socially desirable answers to appease researchers.<sup>35</sup> We tried  
18 371 to reduce this by introducing an independent researcher for the interviews. Our study also  
19 372 has some limitations, principally related to the limited diversity obtained in our sample.  
20 373 Our participants were highly educated, perhaps in part a consequence of recruitment  
21 374 occurring in a university town, were predominantly European, and a smaller proportion  
22 375 of participants were diabetic than was anticipated.<sup>36</sup> Anecdotal feedback indicated that  
23 376 diabetic patients were unwilling to be involved in research that might require additional  
24 377 blood glucose testing than was already required by their condition. Given the limited  
25 378 nature of our sample it is possible that different findings would be evident in a more  
26 379 diverse range of participants, particularly had we been able to recruit a significant number  
27 380 of diabetics with varying levels of glycaemic control. It is possible that participants  
28 381 reported on HT experiences that were intertwined with their own past struggles with  
29 382 other weight loss programs. Thus it is impossible to know if participants' self-reported  
30 383 experiences here are a result solely of the HT protocol, or exposure to weight management  
31 384 strategies in general. This would be a relevant topic for further research.

32 385 Our interviews allowed insight into how participants undergoing HT felt it influenced  
33 386 their eating behaviour, and suggestions for how to better support participants in  
34 387 establishing healthy eating routines, both of which can be used to inform future HT  
35 388 programs and other healthy eating interventions in both primary care and public health  
36 389 settings.

## 37 390 **DECLARATIONS**

38 391 **Author Contributions:** Conceptualization, W.E.dB., A.L.W., R.W.T. and M.R.J;  
39 392 Methodology, W.E.dB., A.L.W. and M.R.J; Formal Analysis, W.E.dB., A.L.W. and M.R.J;  
40 393 Resources, M.R.J; Data Curation, W.E.dB., A.L.W. and M.R.J; Writing-Original Draft  
41 394 Preparation, W.E.dB and M.R.J; Writing-Review & Editing, W.E.dB., A.L.W., R.W.T. and  
42

395 M.R.J; Visualization, M.R.J; Project Administration, W.E.dB. and M.R.J; Funding  
396 Acquisition, R.W.T. and M.R.J.

397 **Funding:** This research was supported by a University of Otago Research Grant.

398 **Acknowledgments:** We would like to thank all participants involved in the hunger  
399 training pilot study (ACTRN12618001257257). Thank you to Associate Professor Ben  
400 Wheeler and Dr Sara Boucher for sharing their expertise with the Freestyle Libre Flash  
401 Glucose Monitoring system.

402 **Conflicts of Interest:** The authors declare no conflict of interest.

403 **List of Abbreviations:** BMI: Body Mass Index, DASS-21: Depression Anxiety Stress Scale,  
404 HbA1c: Hemoglobine A1c, HT: Hunger Training, IQR: Inter-Quartile Range, SSBs: Sugar-  
405 Sweetened Beverages.

## 406 REFERENCES

- 407 1. Franz MJ, VanWormer JJ, Crain AL, et al. Weight-Loss Outcomes: A Systematic Review  
408 and Meta-Analysis of Weight-Loss Clinical Trials with a Minimum 1-Year Follow-  
409 Up. *J Am Diet Assoc* 2007;107(10):1755-67. doi: 10.1016/j.jada.2007.07.017
- 410 2. Johnston BC, Kanters S, Bandayrel K, et al. Comparison of Weight Loss Among Named  
411 Diet Programs in Overweight and Obese Adults: A Meta-analysis. *JAMA*  
412 2014;312(9):923-33. doi: 10.1001/jama.2014.10397
- 413 3. Borkoles E, Carroll S, Clough P, et al. Effect of a non-dieting lifestyle randomised control  
414 trial on psychological well-being and weight management in morbidly obese pre-  
415 menopausal women. *Maturitas* 2016;83:51-58. doi: 10.1016/j.maturitas.2015.09.010
- 416 4. Leblanc V, Provencher V, Bégin C, et al. Impact of a Health-At-Every-Size intervention on  
417 changes in dietary intakes and eating patterns in premenopausal overweight  
418 women: Results of a randomized trial. *Clin Nutr* 2012;31(4):481-88. doi:  
419 10.1016/j.clnu.2011.12.013
- 420 5. Provencher V, Bégin C, Tremblay A, et al. Health-At-Every-Size and Eating Behaviors: 1-  
421 Year Follow-Up Results of a Size Acceptance Intervention. *J Am Diet Assoc*  
422 2009;109(11):1854-61. doi: 10.1016/j.jada.2009.08.017
- 423 6. Van Dyke N, Drinkwater EJ. Review Article Relationships between intuitive eating and  
424 health indicators: literature review. *Public Health Nutr* 2014;17(08):1757-66. doi:  
425 10.1017/S1368980013002139
- 426 7. Bacon L, Keim NL, Van Loan MD, et al. Evaluating a 'non-diet' wellness intervention for  
427 improvement of metabolic fitness, psychological well-being and eating and activity  
428 behaviors. *Int J Obes* 2002;26:854. doi: 10.1038/sj.ijo.0802012
- 429 8. Barkeling B, King NA, Naslund E, et al. Characterization of obese individuals who claim  
430 to detect no relationship between their eating pattern and sensations of hunger or  
431 fullness. *Int J Obes* 2007;31(3):435-39. doi: 10.1038/sj.ijo.0803449
- 432 9. Blundell JE, Stubbs RJ, Golding C, et al. Resistance and susceptibility to weight gain:  
433 individual variability in response to a high-fat diet. *Physiol Behav* 2005;86(5):614-22.  
434 doi: 10.1016/j.physbeh.2005.08.052
- 435 10. Drapeau V, Blundell J, Gallant AR, et al. Behavioural and metabolic characterisation of  
436 the low satiety phenotype. *Appetite* 2013;70:67-72. doi: 10.1016/j.appet.2013.05.022

- 1  
2  
3 437 11. Flint A, Gregersen NT, Gluud LL, et al. Associations between postprandial insulin and  
4 438 blood glucose responses, appetite sensations and energy intake in normal weight  
5 439 and overweight individuals: a meta-analysis of test meal studies. *Br J Nutr*  
6 440 2007;98(01):17-25. doi: 10.1017/S000711450768297X
- 7  
8 441 12. Lemmens SG, Martens EA, Kester AD, et al. Changes in gut hormone and glucose  
9 442 concentrations in relation to hunger and fullness. *Am J Clin Nutr* 2011;94(3):717-25.  
10 443 doi: 10.3945/ajcn.110.008631
- 11  
12 444 13. Ciampolini M, Lovell-Smith D, Sifone M. Sustained self-regulation of energy intake. Loss  
13 445 of weight in overweight subjects. Maintenance of weight in normal-weight subjects.  
14 446 *Nutr Metab* 2010;7:4. doi: 10.1186/1743-7075-7-4
- 15  
16 447 14. Jospe MR, Brown RC, Roy M, et al. Adherence to hunger training using blood glucose  
17 448 monitoring: a feasibility study. *Nutr Metab* 2015;12:22. doi: 10.1186/s12986-015-0017-  
18 449 2
- 19  
20 450 15. Jospe MR, Taylor RW, Athens J, et al. Adherence to Hunger Training over 6 Months and  
21 451 the Effect on Weight and Eating Behaviour: Secondary Analysis of a Randomised  
22 452 Controlled Trial. *Nutrients* 2017;9(11):1260.
- 23  
24 453 16. Burgess E, Hassmen P, Pumpa KL. Determinants of adherence to lifestyle intervention  
25 454 in adults with obesity: a systematic review. *Clin Obes* 2017;7(3):123-35. doi:  
26 455 10.1111/cob.12183 [published Online First: 2017/03/16]
- 27  
28 456 17. Leung AWY, Chan RSM, Sea MMM, et al. An Overview of Factors Associated with  
29 457 Adherence to Lifestyle Modification Programs for Weight Management in Adults.  
30 458 *Int J Environ Res Public Health* 2017;14(8):922.
- 31  
32 459 18. Creswell JW, Plano Clark VL. Choosing a mixed method design. Designing and  
33 460 conducting mixed method research. 2nd ed 2011:58-88.
- 34  
35 461 19. Bacon L, Matz J. Intuitive Eating: Enjoy Your Food, Respect Your Body. *Diabetes Self-  
36 462 Management*, 2010:44-51.
- 37  
38 463 20. Mason M. Sample Size and Saturation in PhD Studies Using Qualitative Interviews.  
39 464 *Forum Qual Soc Res* 2010;11(3) doi: 10.17169/fqs-11.3.1428 [published Online First:  
40 465 2010-08-24]
- 41  
42 466 21. Saunders B, Sim J, Kingstone T, et al. Saturation in qualitative research: exploring its  
43 467 conceptualization and operationalization. *Qual Quant* 2018;52(4):1893-907. doi:  
44 468 10.1007/s11135-017-0574-8 [published Online First: 2017/09/14]
- 45  
46 469 22. Sandelowski M. Whatever happened to qualitative description? *Res Nurs Health*  
47 470 2000;23(4):334-40. doi: 10.1002/1098-240X(200008)23:4<334::AID-NUR9>3.0.CO;2-G
- 48  
49 471 23. Strauss A, Corbin J. Basics of qualitative research: Techniques and procedures for  
50 472 developing grounded theory, 2nd ed. Thousand Oaks, CA, US: Sage Publications,  
51 473 Inc 1998.
- 52  
53 474 24. NVivo qualitative data analysis software [program]. 12 version, 2018.
- 54  
55 475 25. Thomas DR. A General Inductive Approach for Analyzing Qualitative Evaluation Data.  
56 476 *Am J Eval* 2006;27(2):237-46. doi: 10.1177/1098214005283748
- 57  
58 477 26. Sandelowski M. Real qualitative researchers do not count: The use of numbers in  
59 478 qualitative research. *Res Nurs Health* 2001;24(3):230-40. doi: 10.1002/nur.1025
- 60  
479 27. Van Cauwenberg J, Van Holle V, Simons D, et al. Environmental factors influencing  
480 older adults' walking for transportation: a study using walk-along interviews. *Int J  
481 Behav Nutr Phys Act* 2012;9(1):85. doi: 10.1186/1479-5868-9-85



- 1  
2  
3 482 28. Ward AL, Freeman C, McGee R. The influence of transport on well-being among  
4 483 teenagers: A photovoice project in New Zealand. *JTH* 2015;2(3):414-22. doi:  
5 484 10.1016/j.jth.2015.06.004
- 6  
7 485 29. Ciampolini M, Bianchi R. Training to estimate blood glucose and to form associations  
8 486 with initial hunger. *Nutr Metab* 2006;3:42. doi: 10.1186/1743-7075-3-42
- 9  
10 487 30. Warren JM, Smith N, Ashwell M. A structured literature review on the role of  
11 488 mindfulness, mindful eating and intuitive eating in changing eating behaviours:  
12 489 effectiveness and associated potential mechanisms. *Nutr Res Rev* 2017;30(2):272-83.  
13 490 doi: 10.1017/S0954422417000154 [published Online First: 2017/07/18]
- 14  
15 491 31. The Diabetes Prevention Program (DPP) Research Group. The Diabetes Prevention  
16 492 Program (DPP). *Diabetes Care* 2002;25(12):2165. doi: 10.2337/diacare.25.12.2165
- 17  
18 493 32. Lemstra M, Bird Y, Nwankwo C, et al. Weight loss intervention adherence and factors  
19 494 promoting adherence: a meta-analysis. *Patient Prefer Adherence* 2016;10:1547-59. doi:  
20 495 10.2147/PPA.S103649
- 21  
22 496 33. Verheijden MW, Bakx JC, van Weel C, et al. Role of social support in lifestyle-focused  
23 497 weight management interventions. *Eur J Clin Nutr* 2005;59:S179. doi:  
24 498 10.1038/sj.ejcn.1602194
- 25  
26 499 34. Elfhag K, Rössner S. Who succeeds in maintaining weight loss? A conceptual review of  
27 500 factors associated with weight loss maintenance and weight regain. *Obes Rev*  
28 501 2005;6(1):67-85. doi: 10.1111/j.1467-789X.2005.00170.x
- 29  
30 502 35. Stec JA. Bias. In: Lavrakas PJ, ed. *Encyclopedia of Survey Research Methods*. Thousand  
31 503 Oaks, California: Sage Publications, Inc. 2011:57-60.
- 32  
33 504 36. Leung MY, Carlsson NP, Colditz GA, et al. The Burden of Obesity on Diabetes in the  
34 505 United States: Medical Expenditure Panel Survey, 2008 to 2012. *Value Health*  
35 506 2017;20(1):77-84. doi: 10.1016/j.jval.2016.08.735

507

## 508 FIGURE CAPTIONS

509 **Figure 1.** Glucose measuring equipment, (a) the Freestyle Optium Glucose Meter (Abbott  
510 Freestyle Optium Glucose Meter, Australia), test strip and lancet used by the  
511 “fingerpricking” group; (b) the Freestyle Libre Flash Glucose Monitoring system (Abbott  
512 Diabetes Care, Australia), worn by the “scanner” group.

513 **Figure 2.** A page spread from the hunger training booklet



Figure 1. Glucose measuring equipment, (a) the Freestyle Optium Glucose Meter (Abbott Freestyle Optium Glucose Meter, Australia), test strip and lancet used by the "fingerpricking" group; (b) the Freestyle Libre Flash Glucose Monitoring system (Abbott Diabetes Care, Australia), worn by the "scanner" group. Photo by Thirunavukkarasye-Raveendran [CC BY 4.0 (<https://creativecommons.org/licenses/by/4.0>)]

189x133mm (300 x 300 DPI)

1  
2  
3  
4  
5  
6  
7  
8  
9  
10  
11  
12  
13  
14  
15  
16  
17  
18  
19  
20  
21  
22  
23  
24  
25  
26  
27  
28  
29  
30  
31  
32  
33  
34  
35  
36  
37  
38  
39  
40  
41  
42  
43  
44  
45  
46  
47  
48  
49  
50  
51  
52  
53  
54  
55  
56  
57  
58  
59  
60

### The Hunger Scale

|                                 |                                                      |                                           |                          |                                    |                          |                        |                 |                                   |                       |
|---------------------------------|------------------------------------------------------|-------------------------------------------|--------------------------|------------------------------------|--------------------------|------------------------|-----------------|-----------------------------------|-----------------------|
| <b>1</b>                        | <b>2</b>                                             | <b>3</b>                                  | <b>4</b>                 | <b>5</b>                           | <b>6</b>                 | <b>7</b>               | <b>8</b>        | <b>9</b>                          | <b>10</b>             |
| Starving and feeling weak/dizzy | Very hungry, irritable, low energy, stomach growling | Pretty hungry, stomach beginning to growl | Beginning to feel hungry | Satisfied. Neither hungry nor full | Slightly/pleasantly full | Slightly uncomfortable | Feeling stuffed | Very uncomfortable. Stomach aches | So full, feeling sick |

**Day 1** Date \_\_\_\_\_

|                                                                                                                                                                                                                                                                                                                                                       |                                                                                                                                                                                                                                                                                                                                                       |
|-------------------------------------------------------------------------------------------------------------------------------------------------------------------------------------------------------------------------------------------------------------------------------------------------------------------------------------------------------|-------------------------------------------------------------------------------------------------------------------------------------------------------------------------------------------------------------------------------------------------------------------------------------------------------------------------------------------------------|
| <p><b>1</b> Time _____<br/>Hunger (1-10) _____<br/>Glucose _____<br/>Did you eat? Yes   No<br/>Comments _____</p> <p><b>2</b> Time _____<br/>Hunger (1-10) _____<br/>Glucose _____<br/>Did you eat? Yes   No<br/>Comments _____</p> <p><b>3</b> Time _____<br/>Hunger (1-10) _____<br/>Glucose _____<br/>Did you eat? Yes   No<br/>Comments _____</p> | <p><b>4</b> Time _____<br/>Hunger (1-10) _____<br/>Glucose _____<br/>Did you eat? Yes   No<br/>Comments _____</p> <p><b>5</b> Time _____<br/>Hunger (1-10) _____<br/>Glucose _____<br/>Did you eat? Yes   No<br/>Comments _____</p> <p><b>6</b> Time _____<br/>Hunger (1-10) _____<br/>Glucose _____<br/>Did you eat? Yes   No<br/>Comments _____</p> |
|-------------------------------------------------------------------------------------------------------------------------------------------------------------------------------------------------------------------------------------------------------------------------------------------------------------------------------------------------------|-------------------------------------------------------------------------------------------------------------------------------------------------------------------------------------------------------------------------------------------------------------------------------------------------------------------------------------------------------|

|                                                                                                                                                                                                                                                                                                                                                       |                                                                                                                                                                                                                                                                                                                                                          |
|-------------------------------------------------------------------------------------------------------------------------------------------------------------------------------------------------------------------------------------------------------------------------------------------------------------------------------------------------------|----------------------------------------------------------------------------------------------------------------------------------------------------------------------------------------------------------------------------------------------------------------------------------------------------------------------------------------------------------|
| <p><b>7</b> Time _____<br/>Hunger (1-10) _____<br/>Glucose _____<br/>Did you eat? Yes   No<br/>Comments _____</p> <p><b>8</b> Time _____<br/>Hunger (1-10) _____<br/>Glucose _____<br/>Did you eat? Yes   No<br/>Comments _____</p> <p><b>9</b> Time _____<br/>Hunger (1-10) _____<br/>Glucose _____<br/>Did you eat? Yes   No<br/>Comments _____</p> | <p><b>10</b> Time _____<br/>Hunger (1-10) _____<br/>Glucose _____<br/>Did you eat? Yes   No<br/>Comments _____</p> <p><b>11</b> Time _____<br/>Hunger (1-10) _____<br/>Glucose _____<br/>Did you eat? Yes   No<br/>Comments _____</p> <p><b>12</b> Time _____<br/>Hunger (1-10) _____<br/>Glucose _____<br/>Did you eat? Yes   No<br/>Comments _____</p> |
|-------------------------------------------------------------------------------------------------------------------------------------------------------------------------------------------------------------------------------------------------------------------------------------------------------------------------------------------------------|----------------------------------------------------------------------------------------------------------------------------------------------------------------------------------------------------------------------------------------------------------------------------------------------------------------------------------------------------------|

8 9

Figure 2. A page spread from the hunger training booklet

## SUPPLEMENTARY FILE

## Semi-structured interview guide

1. What was it like to measure your **glucose** over the past month?
  - a. Could you tell me something about what you **liked** about measuring your glucose?
  - b. Could you tell me something about what you **disliked** about measuring your glucose?
2. What was it like to **fill in the booklet** over the past month?
  - a. Can you tell something about what you **liked** about filling in the booklet?
  - b. Can you tell something about what you **disliked** about filling in the booklet?
3. Did you see a pattern between your hunger and glucose?
  - a. If no, how much of a problem was this?
  - b. If yes, could you tell a bit more about what you learned?
4. Can you please let me know whether you have **experienced any changes in your behavior** in the past month?
  - a. Do you think this changed because of hunger training?
  - b. You told me something about .... , were there any other changes because of hunger training?
    - i. Possible topics for discussion: routine, number of eating occasions (e.g. number of meals), avoidance of eating due to pain, food choice, awareness of hunger/recognizing when body needs food, previous non-hungry eating (e.g. eating because of routine, emotions, environment), awareness of fullness/satiety (e.g. doesn't have to eat as much as previously thought), awareness of social pressure to eat, physical activity or coping mechanisms (e.g. ways to distract yourself when "hungry" but not allowed to eat).
5. We asked you to measure your glucose every time you felt like eating, and to only eat if your glucose was under your cut-off. How did this work out for you?
  - a. We can imagine this was not always easy, can you tell me why it was sometimes **difficult**?
    - i. Can you please tell me about situations that you **didn't measure** your glucose before eating (if any)?
    - ii. Can you please tell me about situations that your **glucose was too high to eat**, but you ate anyways (if any)?
  - b. Some days it may have **been easier** to follow our instructions than others, can you tell me why?

- 1
  - 2
  - 3
  - 4
  - 5
  - 6
  - 7
  - 8
  - 9
  - 10
  - 11
  - 12
  - 13
  - 14
  - 15
  - 16
  - 17
  - 18
  - 19
  - 20
  - 21
  - 22
  - 23
  - 24
  - 25
  - 26
  - 27
  - 28
  - 29
  - 30
  - 31
  - 32
  - 33
  - 34
  - 35
  - 36
  - 37
  - 38
  - 39
  - 40
  - 41
  - 42
  - 43
  - 44
  - 45
  - 46
  - 47
  - 48
  - 49
  - 50
  - 51
  - 52
  - 53
  - 54
  - 55
  - 56
  - 57
  - 58
  - 59
  - 60
6. Now that you're finished the first month of hunger training, you are no longer going to measure glucose to help you figure out when to eat. You'll continue to fill in the booklet, but only for one week every month. What do you **expect** to happen over the next 5 months?
- a. Do you feel like you have trained yourself to recognize when you are hungry?
  - b. Do yourself to know when to eat without being able to measure your glucose?
7. Do you have any suggestions for us on how we can **improve** hunger training?
- a. Length of time of measuring glucose,
  - b. Communication (e.g. appointments, reminders)
  - c. Equipment
  - d. Booklet/instructions

## Standards for Reporting Qualitative Research (SRQR)\*

<http://www.equator-network.org/reporting-guidelines/srqr/>

Page/line no(s).

### Title and abstract

|                                                                                                                                                                                                                                                              |   |
|--------------------------------------------------------------------------------------------------------------------------------------------------------------------------------------------------------------------------------------------------------------|---|
| <p><b>Title</b> - Concise description of the nature and topic of the study Identifying the study as qualitative or indicating the approach (e.g., ethnography, grounded theory) or data collection methods (e.g., interview, focus group) is recommended</p> | 1 |
| <p><b>Abstract</b> - Summary of key elements of the study using the abstract format of the intended publication; typically includes background, purpose, methods, results, and conclusions</p>                                                               | 2 |

### Introduction

|                                                                                                                                                                     |   |
|---------------------------------------------------------------------------------------------------------------------------------------------------------------------|---|
| <p><b>Problem formulation</b> - Description and significance of the problem/phenomenon studied; review of relevant theory and empirical work; problem statement</p> | 3 |
| <p><b>Purpose or research question</b> - Purpose of the study and specific objectives or questions</p>                                                              | 3 |

### Methods

|                                                                                                                                                                                                                                                                                                                                                                                                             |     |
|-------------------------------------------------------------------------------------------------------------------------------------------------------------------------------------------------------------------------------------------------------------------------------------------------------------------------------------------------------------------------------------------------------------|-----|
| <p><b>Qualitative approach and research paradigm</b> - Qualitative approach (e.g., ethnography, grounded theory, case study, phenomenology, narrative research) and guiding theory if appropriate; identifying the research paradigm (e.g., postpositivist, constructivist/ interpretivist) is also recommended; rationale**</p>                                                                            | 4-5 |
| <p><b>Researcher characteristics and reflexivity</b> - Researchers' characteristics that may influence the research, including personal attributes, qualifications/experience, relationship with participants, assumptions, and/or presuppositions; potential or actual interaction between researchers' characteristics and the research questions, approach, methods, results, and/or transferability</p> | 4   |
| <p><b>Context</b> - Setting/site and salient contextual factors; rationale**</p>                                                                                                                                                                                                                                                                                                                            | 4   |
| <p><b>Sampling strategy</b> - How and why research participants, documents, or events were selected; criteria for deciding when no further sampling was necessary (e.g., sampling saturation); rationale**</p>                                                                                                                                                                                              | 4   |
| <p><b>Ethical issues pertaining to human subjects</b> - Documentation of approval by an appropriate ethics review board and participant consent, or explanation for lack thereof; other confidentiality and data security issues</p>                                                                                                                                                                        | 3   |
| <p><b>Data collection methods</b> - Types of data collected; details of data collection procedures including (as appropriate) start and stop dates of data collection and analysis, iterative process, triangulation of sources/methods, and modification of procedures in response to evolving study findings; rationale**</p>                                                                             | 4   |

|                       |                                                                                                                                                                                                                                                       |     |
|-----------------------|-------------------------------------------------------------------------------------------------------------------------------------------------------------------------------------------------------------------------------------------------------|-----|
| 1<br>2<br>3<br>4<br>5 | <b>Data collection instruments and technologies</b> - Description of instruments (e.g., interview guides, questionnaires) and devices (e.g., audio recorders) used for data collection; if/how the instrument(s) changed over the course of the study | 4   |
| 6<br>7<br>8           | <b>Units of study</b> - Number and relevant characteristics of participants, documents, or events included in the study; level of participation (could be reported in results)                                                                        | 5   |
| 9<br>10<br>11<br>12   | <b>Data processing</b> - Methods for processing data prior to and during analysis, including transcription, data entry, data management and security, verification of data integrity, data coding, and anonymization/de-identification of excerpts    | 4   |
| 13<br>14<br>15<br>16  | <b>Data analysis</b> - Process by which inferences, themes, etc., were identified and developed, including the researchers involved in data analysis; usually references a specific paradigm or approach; rationale**                                 | 4-5 |
| 17<br>18<br>19<br>20  | <b>Techniques to enhance trustworthiness</b> - Techniques to enhance trustworthiness and credibility of data analysis (e.g., member checking, audit trail, triangulation); rationale**                                                                | 4   |

### Results/findings

|                      |                                                                                                                                                                                                   |      |
|----------------------|---------------------------------------------------------------------------------------------------------------------------------------------------------------------------------------------------|------|
| 23<br>24<br>25<br>26 | <b>Synthesis and interpretation</b> - Main findings (e.g., interpretations, inferences, and themes); might include development of a theory or model, or integration with prior research or theory | 5-10 |
| 27<br>28<br>29       | <b>Links to empirical data</b> - Evidence (e.g., quotes, field notes, text excerpts, photographs) to substantiate analytic findings                                                               | 5-10 |

### Discussion

|                                  |                                                                                                                                                                                                                                                                                                                                                                                                             |       |
|----------------------------------|-------------------------------------------------------------------------------------------------------------------------------------------------------------------------------------------------------------------------------------------------------------------------------------------------------------------------------------------------------------------------------------------------------------|-------|
| 32<br>33<br>34<br>35<br>36<br>37 | <b>Integration with prior work, implications, transferability, and contribution(s) to the field</b> - Short summary of main findings; explanation of how findings and conclusions connect to, support, elaborate on, or challenge conclusions of earlier scholarship; discussion of scope of application/generalizability; identification of unique contribution(s) to scholarship in a discipline or field | 10-11 |
| 38<br>39                         | <b>Limitations</b> - Trustworthiness and limitations of findings                                                                                                                                                                                                                                                                                                                                            | 11    |

### Other

|                |                                                                                                                                               |    |
|----------------|-----------------------------------------------------------------------------------------------------------------------------------------------|----|
| 42<br>43<br>44 | <b>Conflicts of interest</b> - Potential sources of influence or perceived influence on study conduct and conclusions; how these were managed | 12 |
| 45<br>46       | <b>Funding</b> - Sources of funding and other support; role of funders in data collection, interpretation, and reporting                      | 12 |

\*The authors created the SRQR by searching the literature to identify guidelines, reporting standards, and critical appraisal criteria for qualitative research; reviewing the reference lists of retrieved sources; and contacting experts to gain feedback. The SRQR aims to improve the transparency of all aspects of qualitative research by providing clear standards for reporting qualitative research.

1  
2  
3  
4  
5  
6  
7  
8  
9  
10  
11  
12  
13  
14  
15  
16  
17  
18  
19  
20  
21  
22  
23  
24  
25  
26  
27  
28  
29  
30  
31  
32  
33  
34  
35  
36  
37  
38  
39  
40  
41  
42  
43  
44  
45  
46  
47  
48  
49  
50  
51  
52  
53  
54  
55  
56  
57  
58  
59  
60

\*\*The rationale should briefly discuss the justification for choosing that theory, approach, method, or technique rather than other options available, the assumptions and limitations implicit in those choices, and how those choices influence study conclusions and transferability. As appropriate, the rationale for several items might be discussed together.

**Reference:**

O'Brien BC, Harris IB, Beckman TJ, Reed DA, Cook DA. **Standards for reporting qualitative research: a synthesis of recommendations.** *Academic Medicine*, Vol. 89, No. 9 / Sept 2014  
DOI: 10.1097/ACM.0000000000000388

For peer review only
